# Supplementary material for: A high-quality genome assembly for the endangered golden snub-nosed monkey (Rhinopithecus roxellana)
Source: PubMed Central journal article supplement (PMC6705546; doi:10.1093/gigascience/giz098), 2019-08-22
Supplement: giz098_giga-d-19-00030_revision_2.pdf [file giz098_giga-d-19-00030_revision_2.pdf]

## A high-quality genome assembly for the endangered golden snub-nosed monkey (*Rhinopithecus roxellana*) --Manuscript Draft--

|                                                      |                                                                                                                                                                                                                                                                                                                                                                                                                                                                                                                                                                                                                                                                                                                                                                                                                                                                                                                                                                                                                                                                                                                                                                                                                                                                                                                                                                                                                                                                                                                                                                                                                                                                                                                                                                                                                                                                                                                                                                                                                                                                                                                                                                                                                                                               |                   |
|------------------------------------------------------|---------------------------------------------------------------------------------------------------------------------------------------------------------------------------------------------------------------------------------------------------------------------------------------------------------------------------------------------------------------------------------------------------------------------------------------------------------------------------------------------------------------------------------------------------------------------------------------------------------------------------------------------------------------------------------------------------------------------------------------------------------------------------------------------------------------------------------------------------------------------------------------------------------------------------------------------------------------------------------------------------------------------------------------------------------------------------------------------------------------------------------------------------------------------------------------------------------------------------------------------------------------------------------------------------------------------------------------------------------------------------------------------------------------------------------------------------------------------------------------------------------------------------------------------------------------------------------------------------------------------------------------------------------------------------------------------------------------------------------------------------------------------------------------------------------------------------------------------------------------------------------------------------------------------------------------------------------------------------------------------------------------------------------------------------------------------------------------------------------------------------------------------------------------------------------------------------------------------------------------------------------------|-------------------|
| <b>Manuscript Number:</b>                            | GIGA-D-19-00030R2                                                                                                                                                                                                                                                                                                                                                                                                                                                                                                                                                                                                                                                                                                                                                                                                                                                                                                                                                                                                                                                                                                                                                                                                                                                                                                                                                                                                                                                                                                                                                                                                                                                                                                                                                                                                                                                                                                                                                                                                                                                                                                                                                                                                                                             |                   |
| <b>Full Title:</b>                                   | A high-quality genome assembly for the endangered golden snub-nosed monkey ( <i>Rhinopithecus roxellana</i> )                                                                                                                                                                                                                                                                                                                                                                                                                                                                                                                                                                                                                                                                                                                                                                                                                                                                                                                                                                                                                                                                                                                                                                                                                                                                                                                                                                                                                                                                                                                                                                                                                                                                                                                                                                                                                                                                                                                                                                                                                                                                                                                                                 |                   |
| <b>Article Type:</b>                                 | Data Note                                                                                                                                                                                                                                                                                                                                                                                                                                                                                                                                                                                                                                                                                                                                                                                                                                                                                                                                                                                                                                                                                                                                                                                                                                                                                                                                                                                                                                                                                                                                                                                                                                                                                                                                                                                                                                                                                                                                                                                                                                                                                                                                                                                                                                                     |                   |
| <b>Funding Information:</b>                          | National Natural Science Foundation of China (31622053)                                                                                                                                                                                                                                                                                                                                                                                                                                                                                                                                                                                                                                                                                                                                                                                                                                                                                                                                                                                                                                                                                                                                                                                                                                                                                                                                                                                                                                                                                                                                                                                                                                                                                                                                                                                                                                                                                                                                                                                                                                                                                                                                                                                                       | Dr. Xiao-Guang Qi |
| <b>Abstract:</b>                                     | <p><b>Background:</b> The golden snub-nosed monkey (<i>Rhinopithecus roxellana</i>) is an endangered colobine species endemic to China. This species has several distinctive traits and is an ideal model for analyses of the evolutionary development of social structures due to its unique social organization. Although a genome assembly for the subspecies <i>R. roxellana hubeiensis</i> is available, this assembly is incomplete and fragmented because it was constructed using short read sequencing technology. Thus, information important for the understanding of <i>R. roxellana</i>, such as genome structural variation and repeat sequences, may be absent from the available assembly. Therefore, a high-quality reference genome is needed.</p> <p><b>Findings:</b> To obtain a high-quality chromosomal assembly for <i>R. roxellana qinlingensis</i>, we used five different methods: Pacific Bioscience single-molecule real-time sequencing, Illumina paired-end sequencing, BioNano optical maps, 10X Genomics link-reads, and high-throughput chromosome conformation capture. The assembled genome was ~3.04 Gb, with a contig N50 of 5.72 Mb and a scaffold N50 of 144.56 Mb. This represented a 100-fold improvement over the previously published genome. In the new genome, 22,497 protein-coding genes were predicted, of which 22,053 were functionally annotated. Gene family analysis showed that 993 and 2,745 gene families were expanded and contracted, respectively, in the <i>R. r. qinlingensis</i> genome. The reconstructed phylogeny recovered a close relationship between <i>Rhinopithecus roxellana</i> and <i>Macaca mulatta</i>, and these two species diverged approximately 13.4 MYA.</p> <p><b>Conclusion:</b> We constructed a high-quality genome assembly of Qinling golden snub-nosed monkey; this genome had superior continuity and accuracy, which might be useful as reference for future genetic studies in this species. In addition, the updated genome assembly might improve our understanding of this species and might be particularly relevant to conservation efforts. Furthermore, this high-quality genome might serve as a new standard reference genome for colobine primates.</p> |                   |
| <b>Corresponding Author:</b>                         | Xiao-Guang Qi<br><br>CHINA                                                                                                                                                                                                                                                                                                                                                                                                                                                                                                                                                                                                                                                                                                                                                                                                                                                                                                                                                                                                                                                                                                                                                                                                                                                                                                                                                                                                                                                                                                                                                                                                                                                                                                                                                                                                                                                                                                                                                                                                                                                                                                                                                                                                                                    |                   |
| <b>Corresponding Author Secondary Information:</b>   |                                                                                                                                                                                                                                                                                                                                                                                                                                                                                                                                                                                                                                                                                                                                                                                                                                                                                                                                                                                                                                                                                                                                                                                                                                                                                                                                                                                                                                                                                                                                                                                                                                                                                                                                                                                                                                                                                                                                                                                                                                                                                                                                                                                                                                                               |                   |
| <b>Corresponding Author's Institution:</b>           |                                                                                                                                                                                                                                                                                                                                                                                                                                                                                                                                                                                                                                                                                                                                                                                                                                                                                                                                                                                                                                                                                                                                                                                                                                                                                                                                                                                                                                                                                                                                                                                                                                                                                                                                                                                                                                                                                                                                                                                                                                                                                                                                                                                                                                                               |                   |
| <b>Corresponding Author's Secondary Institution:</b> |                                                                                                                                                                                                                                                                                                                                                                                                                                                                                                                                                                                                                                                                                                                                                                                                                                                                                                                                                                                                                                                                                                                                                                                                                                                                                                                                                                                                                                                                                                                                                                                                                                                                                                                                                                                                                                                                                                                                                                                                                                                                                                                                                                                                                                                               |                   |
| <b>First Author:</b>                                 | Xiao-Guang Qi                                                                                                                                                                                                                                                                                                                                                                                                                                                                                                                                                                                                                                                                                                                                                                                                                                                                                                                                                                                                                                                                                                                                                                                                                                                                                                                                                                                                                                                                                                                                                                                                                                                                                                                                                                                                                                                                                                                                                                                                                                                                                                                                                                                                                                                 |                   |
| <b>First Author Secondary Information:</b>           |                                                                                                                                                                                                                                                                                                                                                                                                                                                                                                                                                                                                                                                                                                                                                                                                                                                                                                                                                                                                                                                                                                                                                                                                                                                                                                                                                                                                                                                                                                                                                                                                                                                                                                                                                                                                                                                                                                                                                                                                                                                                                                                                                                                                                                                               |                   |
| <b>Order of Authors:</b>                             | Xiao-Guang Qi                                                                                                                                                                                                                                                                                                                                                                                                                                                                                                                                                                                                                                                                                                                                                                                                                                                                                                                                                                                                                                                                                                                                                                                                                                                                                                                                                                                                                                                                                                                                                                                                                                                                                                                                                                                                                                                                                                                                                                                                                                                                                                                                                                                                                                                 |                   |
|                                                      | Lu Wang                                                                                                                                                                                                                                                                                                                                                                                                                                                                                                                                                                                                                                                                                                                                                                                                                                                                                                                                                                                                                                                                                                                                                                                                                                                                                                                                                                                                                                                                                                                                                                                                                                                                                                                                                                                                                                                                                                                                                                                                                                                                                                                                                                                                                                                       |                   |
|                                                      | Jinwei Wu                                                                                                                                                                                                                                                                                                                                                                                                                                                                                                                                                                                                                                                                                                                                                                                                                                                                                                                                                                                                                                                                                                                                                                                                                                                                                                                                                                                                                                                                                                                                                                                                                                                                                                                                                                                                                                                                                                                                                                                                                                                                                                                                                                                                                                                     |                   |
|                                                      | Xiaomei Liu                                                                                                                                                                                                                                                                                                                                                                                                                                                                                                                                                                                                                                                                                                                                                                                                                                                                                                                                                                                                                                                                                                                                                                                                                                                                                                                                                                                                                                                                                                                                                                                                                                                                                                                                                                                                                                                                                                                                                                                                                                                                                                                                                                                                                                                   |                   |
|                                                      |                                                                                                                                                                                                                                                                                                                                                                                                                                                                                                                                                                                                                                                                                                                                                                                                                                                                                                                                                                                                                                                                                                                                                                                                                                                                                                                                                                                                                                                                                                                                                                                                                                                                                                                                                                                                                                                                                                                                                                                                                                                                                                                                                                                                                                                               |                   |

|                                                |                                                                                                                                                                                                                                                                                                                                                                                                                                                                                                                                                                                                                                                                                                                                                                                                                                                                                                                                                                                                                                                                                                                                                                                                                                                                                                                                                                                                                                                                                                                                                                                                                                                                                                                                                                                                                                                                                                                                                                                                                                                                                                                                                                                                                                                                                                                                                                                                                                                                                                                                                                                                                                                                                                                                                                                                                                                                                                                                                                    |
|------------------------------------------------|--------------------------------------------------------------------------------------------------------------------------------------------------------------------------------------------------------------------------------------------------------------------------------------------------------------------------------------------------------------------------------------------------------------------------------------------------------------------------------------------------------------------------------------------------------------------------------------------------------------------------------------------------------------------------------------------------------------------------------------------------------------------------------------------------------------------------------------------------------------------------------------------------------------------------------------------------------------------------------------------------------------------------------------------------------------------------------------------------------------------------------------------------------------------------------------------------------------------------------------------------------------------------------------------------------------------------------------------------------------------------------------------------------------------------------------------------------------------------------------------------------------------------------------------------------------------------------------------------------------------------------------------------------------------------------------------------------------------------------------------------------------------------------------------------------------------------------------------------------------------------------------------------------------------------------------------------------------------------------------------------------------------------------------------------------------------------------------------------------------------------------------------------------------------------------------------------------------------------------------------------------------------------------------------------------------------------------------------------------------------------------------------------------------------------------------------------------------------------------------------------------------------------------------------------------------------------------------------------------------------------------------------------------------------------------------------------------------------------------------------------------------------------------------------------------------------------------------------------------------------------------------------------------------------------------------------------------------------|
|                                                | Dandan Di                                                                                                                                                                                                                                                                                                                                                                                                                                                                                                                                                                                                                                                                                                                                                                                                                                                                                                                                                                                                                                                                                                                                                                                                                                                                                                                                                                                                                                                                                                                                                                                                                                                                                                                                                                                                                                                                                                                                                                                                                                                                                                                                                                                                                                                                                                                                                                                                                                                                                                                                                                                                                                                                                                                                                                                                                                                                                                                                                          |
|                                                | Yuhong Liang                                                                                                                                                                                                                                                                                                                                                                                                                                                                                                                                                                                                                                                                                                                                                                                                                                                                                                                                                                                                                                                                                                                                                                                                                                                                                                                                                                                                                                                                                                                                                                                                                                                                                                                                                                                                                                                                                                                                                                                                                                                                                                                                                                                                                                                                                                                                                                                                                                                                                                                                                                                                                                                                                                                                                                                                                                                                                                                                                       |
|                                                | Yifei Feng                                                                                                                                                                                                                                                                                                                                                                                                                                                                                                                                                                                                                                                                                                                                                                                                                                                                                                                                                                                                                                                                                                                                                                                                                                                                                                                                                                                                                                                                                                                                                                                                                                                                                                                                                                                                                                                                                                                                                                                                                                                                                                                                                                                                                                                                                                                                                                                                                                                                                                                                                                                                                                                                                                                                                                                                                                                                                                                                                         |
|                                                | Suyun Zhang                                                                                                                                                                                                                                                                                                                                                                                                                                                                                                                                                                                                                                                                                                                                                                                                                                                                                                                                                                                                                                                                                                                                                                                                                                                                                                                                                                                                                                                                                                                                                                                                                                                                                                                                                                                                                                                                                                                                                                                                                                                                                                                                                                                                                                                                                                                                                                                                                                                                                                                                                                                                                                                                                                                                                                                                                                                                                                                                                        |
|                                                | Baoguo Li                                                                                                                                                                                                                                                                                                                                                                                                                                                                                                                                                                                                                                                                                                                                                                                                                                                                                                                                                                                                                                                                                                                                                                                                                                                                                                                                                                                                                                                                                                                                                                                                                                                                                                                                                                                                                                                                                                                                                                                                                                                                                                                                                                                                                                                                                                                                                                                                                                                                                                                                                                                                                                                                                                                                                                                                                                                                                                                                                          |
| <b>Order of Authors Secondary Information:</b> |                                                                                                                                                                                                                                                                                                                                                                                                                                                                                                                                                                                                                                                                                                                                                                                                                                                                                                                                                                                                                                                                                                                                                                                                                                                                                                                                                                                                                                                                                                                                                                                                                                                                                                                                                                                                                                                                                                                                                                                                                                                                                                                                                                                                                                                                                                                                                                                                                                                                                                                                                                                                                                                                                                                                                                                                                                                                                                                                                                    |
| <b>Response to Reviewers:</b>                  | <p>Editor Comments to Author:</p> <p>Based on these reports, and my own assessment as Editor, I am pleased to inform you that it is potentially acceptable for publication in GigaScience, once you have carried out some final essential revisions suggested by our reviewers.</p> <p>Response to this comment<br/>We are delighted to see these positive comments. Following the instruction from the editor and the two reviewers, we have fully addressed all comments. See our responses below.</p> <p>Reviewer Comments to Author:</p> <p>Reviewer #1:<br/>This manuscript reports a new whole genome assembly for an interesting nonhuman primate species, <i>Rhinopithecus roxellana</i>. This is a colobine species that has a number of unusual characteristics, including but not limited to unusual pelage, highly derived facial morphology, and social organization that is not entirely unique but is rare among Old World monkeys or other anthropoids. There are five species in the genus, and all are threatened or endangered, so there is a conservation benefit to this genome sequencing as well as basic comparative primate evolutionary genomics. There is a previously published whole genome assembly for this species, but this new assembly is a significant improvement (see below). Consequently, there are several elements of this work that make it noteworthy.<br/>This is a revised manuscript. This version of the paper is significantly improved from the first version. Most of my comments and concerns have been satisfactorily addressed. But I do have some minor issues with this revision. I believe the authors can easily correct these remaining problems.</p> <p>1) The sentence in lines 85-87 ("Genomic analyses have helped...") seems unnecessary and out of place. I suggest deleting this sentence.<br/>Response to comment 1<br/>Following this comment, we deleted this sentence. Please see lines 58 - 60 on page 4 for details.</p> <p>2) Line 141. An N50 value is not the same as an average. The authors should indicate whether this value of 16.69 kb is an average or an N50. The latter is the preferred way to report this statistic.<br/>Response to comment 2<br/>Thanks for this comment. We agree that an N50 value is not the same as an average. we checked this value carefully and found that it indicated an N50 value. We changed the statement as follows (Lines 105, bottom of page 6).<br/>"TheN50 length of the PacBio reads was 16.69 kb."</p> <p>3) Line 149: Same comment as #2<br/>Response to comment 3<br/>Thanks for this comment. We changed the statement as follows (Line 110 on top of page 7):<br/>"The N50 length of the molecules used for optical mapping was 338 kb."</p> <p>4) Line 301: I would suggest adding the word "non-reference" so that it reads "We found that the homozygous non-reference SNPs comprise 0.0004%...."<br/>Response to comment 4</p> |

Following this comment, we added "non-reference" in this sentence. (Line 201 on top of page 12)

"We found that the homozygous non-reference SNPs (single nucleotide polymorphism) comprised 0.0004% of all SNPs (7,690 of 559,048)."

5) Line 309: I think you need "also" inserted - "completeness was also measured..."

Response to comment 5

Thanks for this comment. We followed this comment and inserted "also" in this sentence. (Line 209 on page 12)

"Assembly completeness was also measured using the core eukaryotic gene (CEG)-mapping approach (CEGMA v2.5) [31]"

6) Line 317: There is at least one word missing or out of place here. Please edit.

Response to comment 6

Thanks for your valuable comment. We are sorry we made a mistake here. We revised this sentence (lines 217, bottom of page 12).

"Repeat sequences account for a large proportion of the total genome. It is thus important to identify repeat elements."

7) Lines 336 - 342. I do not understand how the authors identify copy number variation when they did not study and do not report DNA sequences from multiple individuals. There is only one reference sequence reported in this paper. Did the authors look at copy number differences between haplotypes of that one diploid monkey? This section is very confusing to me. Either the source of the samples used for CNV analysis must be presented, or this could be deleted. Some editing is required.

Response to comment 7

Thanks for your valuable comment. It is true that analysis of one sample does not show copy number variations. We are sorry that this section was not clear enough. The term CNVs analysis, should be better termed duplications in our study. And those duplicate sequences were identified based on read depth. We added several sentences to address this comment (Lines 237-247, top of page 14):

"We also performed duplicate sequences identification analysis, which was fulfilled based on the read depth of Illumina short reads. In brief, we first mapped the Illumina short reads to the assembled genome using BWA with default parameters. Then, the sorted mapping bam file was used as input for CNVnator v0.3.3 [35], a tool targeting alterations in the read depth, with the parameters of "-unique -his 100 -stat 100 -call 100.". The obtained duplicate sequences were filtered, retaining only those where q0 was <0.5 and e-val1 was <0.05. After filtering, 676 duplicate sequences remained, with a total length of 9,198,900 bp (Supplementary Table S12). Further analysis showed that 101 duplications located at the end of scaffolds (5% of the total length in both ends). And there were 136 gene present in the duplicated regions, these genes were mainly involved in basic biological processes such as ribonucleoside binding, phosphatase activity, and protein dephosphorylation et al."

8) Lines 389 - 391. What animal was used to obtain the heart and skin tissue for RNA sequencing? Were these tissues obtained from the same animal used for DNA sequencing and reference assembly? Please state source of tissue for RNA sequencing.

Thanks for this comment. The animal used for RNA sequencing was the same individual with DNA sequencing and reference assembly. We stated source of tissue for RNA sequencing in Lines 275 -276 (top of page 16):

"High-quality RNAs from the heart and skin tissue of the *R. roxellana qinlingensis* specimen (the same individual used for DNA sequencing and reference assembly) were sequenced on an Illumina Novaseq 6000 platform."

9) I think Figure 2 would be better in the Supplement than main text. If the authors think this is important, presenting it in the supplement is fine. But I do not see that this

|                                                                                                                                                                                                                                                                                                        |                                                                                                                                                                                                                                                                                                                                                                                                                                                                                                                                                                                                                                                                                                                                                                                                                                                                                                                                                                                                                                                                                                                                                                                                                                                                                                                                                                                                                                                                                                                                                                                                                                                                                                                                                                                                                                                                                                                                                                                                                                                                                                                                                                                                                                                                                                                                                                                                                                                                                                                                                                                                                                                                                                                                                                                                                                                                                                                                                                                                                                        |
|--------------------------------------------------------------------------------------------------------------------------------------------------------------------------------------------------------------------------------------------------------------------------------------------------------|----------------------------------------------------------------------------------------------------------------------------------------------------------------------------------------------------------------------------------------------------------------------------------------------------------------------------------------------------------------------------------------------------------------------------------------------------------------------------------------------------------------------------------------------------------------------------------------------------------------------------------------------------------------------------------------------------------------------------------------------------------------------------------------------------------------------------------------------------------------------------------------------------------------------------------------------------------------------------------------------------------------------------------------------------------------------------------------------------------------------------------------------------------------------------------------------------------------------------------------------------------------------------------------------------------------------------------------------------------------------------------------------------------------------------------------------------------------------------------------------------------------------------------------------------------------------------------------------------------------------------------------------------------------------------------------------------------------------------------------------------------------------------------------------------------------------------------------------------------------------------------------------------------------------------------------------------------------------------------------------------------------------------------------------------------------------------------------------------------------------------------------------------------------------------------------------------------------------------------------------------------------------------------------------------------------------------------------------------------------------------------------------------------------------------------------------------------------------------------------------------------------------------------------------------------------------------------------------------------------------------------------------------------------------------------------------------------------------------------------------------------------------------------------------------------------------------------------------------------------------------------------------------------------------------------------------------------------------------------------------------------------------------------------|
|                                                                                                                                                                                                                                                                                                        | <p>contributes significantly to the major findings of the paper. If the authors feel strongly that it must remain in the main text, that is acceptable and I would not make an issue out of that. But I do not see the major significance beyond providing validation. No biological insight is provided by this figure.</p> <p>Response to comment 9<br/>Thanks for this valuable comment. The fig. 2 was based on the interaction frequencies between pairs of 100-kb genomic regions, which could be used to indicate the reliability of our assembly. Despite that no great biological insights provided by this figure, this figure was generated with great effort and could convert some information about our data quality, an important topic in this high quality genome work. Thus, the Figure 2 would be better in the main text.</p> <p>Reviewer #2: The revision is substantially improved and most of the concerns of the reviewers have been resolved.</p> <p>CNV analysis: (line 337). I think these are better termed duplications, not CNVs, as analysis of one sample does not show whether they are copy number variable in the population. Are the duplications found at the end of contigs? Were there any gene annotations present in the duplicated sequences.<br/>Response to this comment<br/>Thanks for your valuable comment. It is true that analysis of one sample does not show copy number variations. We are sorry that this section was not clear enough. The term CNVs analysis, should be better termed duplications in our study. And those duplicate sequences were identified based on read depth. Further analysis of the positions of these duplicate sequences showed that 101 duplications located at the end of scaffolds. In addition, there were 136 genes present in the duplicated regions, they were mainly involved in basic biological processes. We added several sentences to address this comment (Lines 237-247, top of page 14):</p> <p>“We also performed duplicate sequences identification analysis, which was fulfilled based on the read depth of Illumina short reads. In brief, we first mapped the Illumina short reads to the assembled genome using BWA with default parameters. Then, the sorted mapping bam file was used as input for CNVnator v0.3.3 [35], a tool targeting alterations in the read depth, with the parameters of “-unique -his 100 -stat 100 -call 100.”. The obtained duplicate sequences were filtered, retaining only those where q0 was &lt;0.5 and e-val1 was &lt;0.05. After filtering, 676 duplicate sequences remained, with a total length of 9,198,900 bp (Supplementary Table S12). Further analysis showed that 101 duplications located at the end of scaffolds (5% of the total length in both ends). And there were 136 gene present in the duplicated regions, these genes were mainly involved in basic biological processes such as ribonucleoside binding, phosphatase activity, and protein dephosphorylation et al.”.</p> |
| <b>Additional Information:</b>                                                                                                                                                                                                                                                                         |                                                                                                                                                                                                                                                                                                                                                                                                                                                                                                                                                                                                                                                                                                                                                                                                                                                                                                                                                                                                                                                                                                                                                                                                                                                                                                                                                                                                                                                                                                                                                                                                                                                                                                                                                                                                                                                                                                                                                                                                                                                                                                                                                                                                                                                                                                                                                                                                                                                                                                                                                                                                                                                                                                                                                                                                                                                                                                                                                                                                                                        |
| <b>Question</b>                                                                                                                                                                                                                                                                                        | <b>Response</b>                                                                                                                                                                                                                                                                                                                                                                                                                                                                                                                                                                                                                                                                                                                                                                                                                                                                                                                                                                                                                                                                                                                                                                                                                                                                                                                                                                                                                                                                                                                                                                                                                                                                                                                                                                                                                                                                                                                                                                                                                                                                                                                                                                                                                                                                                                                                                                                                                                                                                                                                                                                                                                                                                                                                                                                                                                                                                                                                                                                                                        |
| Are you submitting this manuscript to a special series or article collection?                                                                                                                                                                                                                          | No                                                                                                                                                                                                                                                                                                                                                                                                                                                                                                                                                                                                                                                                                                                                                                                                                                                                                                                                                                                                                                                                                                                                                                                                                                                                                                                                                                                                                                                                                                                                                                                                                                                                                                                                                                                                                                                                                                                                                                                                                                                                                                                                                                                                                                                                                                                                                                                                                                                                                                                                                                                                                                                                                                                                                                                                                                                                                                                                                                                                                                     |
| <b>Experimental design and statistics</b>                                                                                                                                                                                                                                                              | Yes                                                                                                                                                                                                                                                                                                                                                                                                                                                                                                                                                                                                                                                                                                                                                                                                                                                                                                                                                                                                                                                                                                                                                                                                                                                                                                                                                                                                                                                                                                                                                                                                                                                                                                                                                                                                                                                                                                                                                                                                                                                                                                                                                                                                                                                                                                                                                                                                                                                                                                                                                                                                                                                                                                                                                                                                                                                                                                                                                                                                                                    |
| <p>Full details of the experimental design and statistical methods used should be given in the Methods section, as detailed in our <a href="#">Minimum Standards Reporting Checklist</a>. Information essential to interpreting the data presented should be made available in the figure legends.</p> |                                                                                                                                                                                                                                                                                                                                                                                                                                                                                                                                                                                                                                                                                                                                                                                                                                                                                                                                                                                                                                                                                                                                                                                                                                                                                                                                                                                                                                                                                                                                                                                                                                                                                                                                                                                                                                                                                                                                                                                                                                                                                                                                                                                                                                                                                                                                                                                                                                                                                                                                                                                                                                                                                                                                                                                                                                                                                                                                                                                                                                        |



|                                                                                                                                                                                                                                                                                                                                                                                                                                                                                                                                                         |            |
|---------------------------------------------------------------------------------------------------------------------------------------------------------------------------------------------------------------------------------------------------------------------------------------------------------------------------------------------------------------------------------------------------------------------------------------------------------------------------------------------------------------------------------------------------------|------------|
| <p>Have you included all the information requested in your manuscript?</p>                                                                                                                                                                                                                                                                                                                                                                                                                                                                              |            |
| <p><b>Resources</b></p> <p>A description of all resources used, including antibodies, cell lines, animals and software tools, with enough information to allow them to be uniquely identified, should be included in the Methods section. Authors are strongly encouraged to cite <a href="#">Research Resource Identifiers</a> (RRIDs) for antibodies, model organisms and tools, where possible.</p> <p>Have you included the information requested as detailed in our <a href="#">Minimum Standards Reporting Checklist</a>?</p>                     | <p>Yes</p> |
| <p><b>Availability of data and materials</b></p> <p>All datasets and code on which the conclusions of the paper rely must be either included in your submission or deposited in <a href="#">publicly available repositories</a> (where available and ethically appropriate), referencing such data using a unique identifier in the references and in the “Availability of Data and Materials” section of your manuscript.</p> <p>Have you have met the above requirement as detailed in our <a href="#">Minimum Standards Reporting Checklist</a>?</p> | <p>Yes</p> |



13 **ABSTRACT**

14

15 **Background:** The golden snub-nosed monkey (*Rhinopithecus roxellana*) is an endangered  
16 colobine species endemic to China. This species has several distinctive traits and is an ideal  
17 model for analyses of the evolutionary development of social structures due to its unique social  
18 organization. Although a genome assembly for the subspecies *R. roxellana hubeiensis* is  
19 available, this assembly is incomplete and fragmented because it was constructed using short  
20 read sequencing technology. Thus, information important for the understanding of *R. roxellana*,  
21 such as genome structural variation and repeat sequences, may be absent from the available  
22 assembly. Therefore, a high-quality reference genome is needed.

23 **Findings:** To obtain a high-quality chromosomal assembly for *R. roxellana qinlingensis*, we  
24 used five different methods: Pacific Bioscience single-molecule real-time sequencing, Illumina  
25 paired-end sequencing, BioNano optical maps, 10X Genomics link-reads, and high-throughput  
26 chromosome conformation capture. The assembled genome was ~3.04 Gb, with a contig N50  
27 of 5.72 Mb and a scaffold N50 of 144.56 Mb. This represented a 100-fold improvement over  
28 the previously published genome. In the new genome, 22,497 protein-coding genes were  
29 predicted, of which 22,053 were functionally annotated. Gene family analysis showed that 993  
30 and 2,745 gene families were expanded and contracted, respectively, in the *R. r. qinlingensis*

31 genome. The reconstructed phylogeny recovered a close relationship between *Rhinopithecus*  
32 *rollexana* and *Macaca mulatta*, and these two species diverged approximately 13.4 MYA.

33 **Conclusion:** We constructed a high-quality genome assembly of Qinling golden snub-nosed  
34 monkey; this genome had superior continuity and accuracy, which might be useful as reference  
35 for future genetic studies in this species. In addition, the updated genome assembly might  
36 improve our understanding of this species and might be particularly relevant to conservation  
37 efforts. Furthermore, this high-quality genome might serve as a new standard reference genome  
38 for colobine primates.

39

40 **Keywords:** high-quality; *Rhinopithecus roxellana*; genome assembly; annotation; BioNano  
41 optical maps

42

### 43 **Background information**

44 The snub-nosed monkeys (genus *Rhinopithecus*) consist of five endangered species narrowly  
45 restricted to China and Vietnam [1]. Of those, the golden snub-nosed monkey (*Rhinopithecus*  
46 *roxellana*, NCBI:txid61622), also known as the Sichuan snub-nosed monkey, has the  
47 northernmost distribution of all Asian colobine species; this monkey is found only in three  
48 isolated regions in central and northwest China (the Sichuan, Gansu, Shaanxi, and Hubei  
49 Provinces) [2, 3]. The golden snub-nosed monkey is characterized by several distinctive traits,

50 including golden fur, a blue facial color, an odd-shaped nose, and folivory. In addition, the  
51 species has a unique multilevel social system; such complex systems are found only in a few  
52 mammals, including humans [4]. Therefore, the Qinling golden snub-nosed monkey is an ideal  
53 model for the analysis of social structure evolution in primates and may also provide  
54 opportunities to investigate evolutionary and socio-anthropological patterns of human society.

55       Based on morphological variations and discontinuous distributions, *R. roxellana* is  
56 distinguished into three subspecies: *R. r. roxellana* from the Minshan Mountain in the Sichuan  
57 and Gansu Provinces, *R. r. qinlingensis* from the Qinling Mountain in Shaanxi Province, and  
58 *R. r. hubeiensis* from Shennongjia Mountain in Hubei Province [3]. Recent studies of *R. r.* have  
59 focused on behavioral dynamics, population history, and social systems [5-7]. To date, only a  
60 single genome assembly is available for the golden snub-nosed monkey. This assembly,  
61 published in 2014, was derived from short sequencing reads generated by the Illumina HiSeq  
62 2000 platform [8]. Several studies have been published based on these data, including analyses  
63 of the folivorous dietary adaptations of *R. r.* and its evolutionary history [8-10]. Despite the  
64 utility of this previously published data, much relevant information, including structural  
65 variations and repeat sequences, is largely absent or unreliable due to the incomplete and  
66 fragmented genome assembly [11, 12].

67       Owing to advances in sequencing technology, it is now possible to obtain high-quality  
68 genome assemblies that can provide new insights in organismal research. Indeed, many

69 previously unreported transposable elements and specific genes in maize were identified using  
70 an improved reference genome [13]. By combining new sequencing approaches, Seo et al. [11]  
71 discovered clinically relevant structural variants and previously unreported genes in the  
72 updated human genome. New sequencing technologies, including Pacific Bioscience's single-  
73 molecule real-time (SMRT) sequencing, BioNano optical mapping, and Hi-C-based chromatin  
74 interaction maps, have been used in several species closely related to humans, including  
75 gorillas (*Gorilla gorilla gorilla*) [14], chimpanzees (*Pan troglodytes*) [15], and Sumatran  
76 orangutans (*Pongo abelii*) [15], as well as in other species, including the domestic goat (*Capra*  
77 *hircus*) [16]. Importantly, it was estimated that 87% of the missing reference exons and  
78 incomplete gene models were recovered using the new gorilla assembly [14]. In addition,  
79 several novel genes expressed in the brain were identified using the new orangutan assembly,  
80 and complete immune genes with longer repetitive structures were identified in the updated  
81 goat genome [16]. However, the *R. r.* genome has not yet been updated using new sequencing  
82 approaches, slowing progress towards a better understanding of this endangered species.

83       Here, we report a greatly improved assembly of the reference genome for *R. r.* generated  
84 by a combination of five technologies: SMRT sequencing from Pacific Biosciences (PacBio),  
85 HiSeq paired-end sequencing from Illumina (HiSeq), BioNano optical maps (BioNano), 10X  
86 Genomics link-reads (10X Genomics), and high-throughput chromosome conformation  
87 capture (Hi-C). Our results represent the first colobine genome sequenced and assembled with

88 both long reads and short reads. This updated genome assembly may allow us to further  
89 investigate *R. r.*, providing new opportunities to analyze evolutionary history and to identify  
90 genetic changes associated with the development of specific traits in this species. Such analyses  
91 may provide insights helpful for the conservation of this endangered primate. In addition, this  
92 genome, which has superior continuity and accuracy, will act as a new reference genome for  
93 colobine primates.

94

## 95 **Data Description**

### 96 **Sample collection and sequencing**

97 The animal used for sequencing was an adult male *R. r. qinlingensis* from Qinling Mountain,  
98 who died of natural causes, and then stored shortly after death in an ultra-cold storage freezer  
99 at Louguantai Breeding Centre, Xi'an, Shaanxi Province, China. Total genomic DNA was  
100 extracted from the heart tissue. To acquire a high-quality genome assembly, we combined five  
101 sequencing methods. Initially, PacBio SMRT sequencing was performed on the SEQUEL  
102 platform following the manufacturer's instructions. After quality control, during which  
103 subreads shorter than 500 bp were removed, 304.84 Gb clean long reads (95.86X coverage)  
104 remained. The N50 length of the PacBio reads was 16.69 kb. Simultaneously, paired-end  
105 sequencing was performed using an Illumina NovaSeq 6000 platform, with an insert size of  
106 350 bp. Then those short reads were filtered using the SOAPdenovo2 software [17], removing



107 reads with adapters, contaminations, >10% unknown bases (N), or low quality. After filtering,  
108 423.32 Gb clean reads remained (133.12X coverage). A high-quality optical genome map was  
109 also constructed with the Irys platform (BioNano Genomics). The N50 length of the molecules  
110 used for optical mapping was 338 kb. The average BioNano optimal marker density examined  
111 was 11.66 per 100 kb, while the average marker density was 12.62 per 100 kb for the predicted  
112 map based on the assembled contigs. Thus, the observed BioNano map was consistent with the  
113 predicted map. The BioNano map generated 463.75 Gb of large DNA molecules. Next, 10X  
114 genomic linked-reads sequencing was performed on an Illumina Hiseq Xten platform,  
115 generating 348.41 Gb clean reads (109.56X coverage). Finally, a Hi-C library was prepared  
116 and sequenced with an Illumina NovaSeq 6000 platform to produce a chromosome-scale  
117 scaffolding of the genome assembly. Adapter sequences and low-quality reads were discarded  
118 using Cutadapt v1.0 [18] with the parameters “-e 0.1 -O 5 -m 100 -n 2 --pair-filter=both,”  
119 yielding 310.92 Gb clean data (97.77X coverage). Detailed sequencing statistics are given in  
120 **Table 1.**

121

## 122 ***De novo* assembly of the *R. roxellana* genome**

123 An estimation of genome size would increase our understanding of *R. roxellana* and the  
124 challenges in sequencing it. Thus, we estimated the size of the *R. roxellana* genome as  $G =$   
125  $(K_{total} - K_{error})/D$ , where  $G$  represented genome size,  $K_{total}$  represented the total number of k-

126 mers,  $K_{error}$  represented the number of k-mers with sequencing errors, and  $D$  indicated the k-  
127 mer depth. We generated 109,210,004,556 k-mers, 1,159,024,556 of which had sequencing  
128 errors. The peak k-mer depth was 34. Thus, the genome size of *R. roxellana* was estimated to  
129 be about 3.18 Gb. The distribution of k-mer frequencies is given in **Supplementary Fig. S1**.

130 The *de novo* assembly of the newly sequenced *R. roxellana* genome was performed in  
131 four progressive stages. First, long reads obtained from the PacBio platform were assembled  
132 as follows: detection of overlap and read correction, detection of overlap between pairs of  
133 corrected reads, and string graph construction. Assembly of the PacBio long reads was  
134 performed using FALCON (version 0.4.0, Falcon, RRID:SCR\_016089) [19] with the  
135 parameter set “length\_cutoff = 5000, length\_cutoff\_pr = 5000, pa\_HPCdaligner\_option = -v -  
136 B128 -e.70 -k14 -h128 -l2000 -w8 -T8 -s700, ovlp\_HPCdaligner\_option = -v -B128 -e.96 -k16  
137 -h480 -l1500 -w8 -T16 -s700”. Next, the assembled PacBio contigs was polished using Quiver  
138 (SMRTLink version 5.1.0) with PacBio long reads [20], and also the contig assembly was  
139 corrected by Pilon-1.18 (java -Xmx500G -jar pilon-1.18.jar --diploid --threads 30) with  
140 Illumina short reads [21]. The contig N50 of the initial assembly was 4.74 Mb (**Supplementary**  
141 **Table S1**). Using the initial genome assembly, SSPACE-LongRead v1-1 [22] was  
142 implemented for getting a longer scaffold by processing PacBio long reads and the initial  
143 genome assembly with the command “perl SSPACE-LongRead.pl -c <contig-sequences> -p  
144 <pacbio-reads>.” This procedure generated a genome assembly with scaffold N50 of 7.81 Mb

145 **(Supplementary Table S2)**. The remaining gaps in the assembly were closed using the PBjelly  
146 module in the PBSuite (version 15.8.24) [23] with default settings. Thus, at the end of the first  
147 stage, the genome assembly had a contig N50 of 5.72 Mb and a scaffold N50 of 8.20 Mb  
148 **(Supplementary Table S3)**.

149 In the second stage, the BioNano molecules were filtered, requiring a minimum length of  
150 150 kb and minimum of nine labels per molecule. Then, a genome map was assembled *de novo*  
151 with IrysView (version 2.3; BioNano Genomics), based on the optically mapped molecules.  
152 The assembled PacBio scaffolds were input into hybridScaffold [24]. In brief, the hybrid  
153 scaffolding process included the alignment of the PacBio scaffolds against the BioNano  
154 genome maps, followed by the identification and resolution of conflicting alignments. At the  
155 end of stage two, the hybrid genome assembly had a scaffold N50 of 9.22 Mb **(Supplementary**  
156 **Table S4)**.

157 In the third stage, the 10X genomic linked reads were connected with the scaffolds  
158 generated in stage two to construct super-scaffolds. In brief, we used the long ranger basic  
159 pipeline (<https://support.10xgenomics.com/genome-exome/software/downloads/>) to handle  
160 the basic read in and barcode processing of the 10X genomic linked reads. The processed 10X  
161 linked reads were then mapped to the hybrid genome assembly from stage two with bowtie2  
162 [25], using the command “bowtie2 genome.fa -1 reads1.fq.gz -2 reads2.fq.gz -p 12 -D 1 -R 1 -  
163 N 0 -L 28 -i S,0,2.50 --n-ceil L,0,0.02 --rdg 5,10 --rfg 5,10)”. We also used a self-against-self

164 (genome.fa-against-genome.fa) blastn to generate two bed files, and merged these files using  
165 fragScaff (version 140324.1) [26], with the parameters “-fs1 '-m 3000 -q 20 -E 30000 -o 60000',  
166 -fs2 '-C 2', -fs3 '-j 1.5 -u 2'.”. These procedures generated an updated genome assembly with a  
167 scaffold N50 of 24.09 Mb (**Supplementary Table S5**). Subsequently, we corrected errors in  
168 the assembly, based on the Illumina short reads, using the Burrows-Wheeler Aligner (BWA,  
169 RRID:SCR\_010910) [27] and Pilon-1.18 (Pilon, RRID:SCR\_014731) [21].

170 In the fourth stage, the Hi-C data were used to build chromosome-level assembly scaffolds.  
171 In brief, Hi-C sequencing data were first aligned to the assembled genome using BWA [27].  
172 Scaffolds were then clustered, ordered, and oriented using Lachesis [28], with the parameter  
173 set “CLUSTER\_MIN\_RE\_SITES = 1800, CLUSTER\_MAX\_LINK\_DENSITY = 4, and  
174 CLUSTER\_NONINFORMATIVE\_RATIO = 0.” This procedure generated 22 accurately  
175 clustered and ordered pseudo-chromosomes, with a genome size of 3.04 Gb, a contig N50 of  
176 5.72 Mb, and a scaffold N50 of 144.56 Mb (**Table 2**). The pseudo-chromosomes were divided  
177 into 100-kb bins and the interaction frequencies between pairs of 100-kb genomic regions were  
178 determined (**Fig. 2**).

179

## 180 **Assessment of the genome newly assembled**

181 We evaluated our newly assembled *R. roxellana* genome against the previously published  
182 assembly. The contiguity of our *R. roxellana* genome was 100-fold greater (contig N50: 5.72

183 Mb; scaffold N50: 144.56) than the previous version (contig N50: 25.5 kb; scaffold N50: 1.55  
184 Mb) [8]. We also aligned our genome against the previous version using MUMMER  
185 (v4.0.0beta2) [29] and identified 6,452 gaps in the previous version that were predicted to be  
186 filled by >29.7 Mb of sequence in our new assembly. These filled gaps were mainly located in  
187 the intergenic and repetitive regions, with a small fraction of the sequence data annotated as  
188 gene regions. Our new assembly also had a higher proportion of repeat sequences (50.82%) as  
189 compared to the previous version (46.15%); in particular, the number of LINE (long  
190 interspersed elements) transposable elements and tandem repeats was greatly increased (further  
191 details are given below, in the “Identification of repeat elements” section). Thus, the newly  
192 assembled genome was substantially more complete and continuous. It was likely that the  
193 remarkable improvement in contiguity was due to the increased read length, deeper sequencing  
194 depth, improved gap assembly, and more sophisticated assembly algorithm.

195 To assess the accuracy of our genome assembly, we aligned the Illumina short reads to  
196 the assembly using BWA [27], with the parameters “-o 1 -i 15”. Approximately 99.17% of the  
197 short reads were mapped to the genome assembly. Further investigations indicated that these  
198 reads covered approximately 99.27% of the total assembly (**Supplementary Table S6**).  
199 Genome assembly accuracy was also measured using the standard variant calling method in  
200 samtools (<http://samtools.sourceforge.net/>), with the command “samtools mpileup -q 20 -Q 20  
201 -C 50 -uDef.” We found that the homozygous non-reference SNPs (single nucleotide

202 polymorphism) comprised 0.0004% of all SNPs (7,690 of 559,048), suggesting that our  
203 genome assembly was highly accurate (**Supplementary Table S7**). In addition, we estimated  
204 assembly completeness using Benchmarking Universal Single-copy Orthologs (BUSCO,  
205 RRID:SCR\_015008) v3.0.2 [30], with the parameters “-i -o -l -m genome -f -t.” based on  
206 mammalia\_odb9 (creation date: 2016-02-13; number of species: 50; number of BUSCOs:  
207 4,104). BUSCO analysis identified 4,104 mammalian BUSCOs in the newly assembled *R.*  
208 *roxellana* genome: 94.0% complete BUSCOs, 2.9% fragmented BUSCOs, and 3.1% missing  
209 BUSCOs (**Supplementary Table S8**). Assembly completeness was also measured using the  
210 core eukaryotic gene (CEG)-mapping approach (CEGMA v2.5) [31]. Of the 248 CEGs known  
211 from six model species, 93.95% (233 of 248) were identified in our new genome assembly. Of  
212 these, 220 CEGs were complete and unfragmented, and the remaining 13 were complete but  
213 fragmented (**Supplementary Table S9**). Together, these analyses indicated that our new  
214 genome assembly was highly accurate and complete.

215

## 216 **Identification of repeat elements**

217 Repeat sequences account for a large proportion of the total genome. It is thus important  
218 to identify repeat elements. Here, we predicted and classified repeat elements both based on  
219 homology and *de novo*. In the homology approach, we searched the genome for repetitive DNA  
220 elements (as listed in the Repbase database v16.02) using RepeatMasker v4.0.6 (RepeatMasker,

221 RRID:SCR\_012954, <http://www.repeatmasker.org/>) [32] with the parameters “-a -nolow -  
222 no\_is -norna -parallel 1” and using RepeatProteinMask (implemented in RepeatMasker). To  
223 identify repetitive elements *de novo*, we used RepeatModeler v1.0.11 (RepeatModeler,  
224 RRID:SCR\_015027) [33], with the parameters “-database genome -engine ncbi -pa 15).”  
225 Tandem repeats in the genome were detected using Tandem Repeat Finder (TRF) v4.07b [34],  
226 with parameters “2 7 7 80 10 50 2000 -d -h”). We merged the results of the two methods. In  
227 total, the new genome assembly comprised 50.81% repetitive sequences (**Supplementary**  
228 **Table S10**). Closer investigation indicated that the largest categories of repeat elements in the  
229 *R. roxellana* genome were the short and long interspersed nuclear elements (SINEs and LINEs,  
230 respectively). In addition, several repeat elements absent from Repbase database were detected  
231 in the *de novo* approach (**Supplementary Table S10**). The total length of these repeat elements  
232 was 186,195,432bp, accounting for 6.13% of the genome, suggesting that these repeat elements  
233 may be specific for *R. roxellana*. Compared with the repeat sequences in the previous assembly,  
234 our genome included relatively more LINE transposable elements (28.23% vs. 6.21%) and  
235 tandem repeats (6.20% vs. 2.82%). The detailed categories of repeat elements are summarized  
236 in **Supplementary Table S11**.

### 237 **Duplicate sequences identification**

238 We also performed duplicate sequences identification analysis, which was fulfilled based  
239 on the read depth of Illumina short reads. In brief, we first mapped the Illumina short reads to



240 the assembled genome using BWA with default parameters. Then, the sorted mapping bam file  
241 was used as input for CNVnator v0.3.3 [35], a tool targeting alterations in the read depth, with  
242 the parameters of “-unique -his 100 -stat 100 -call 100.”. The obtained duplicate sequences  
243 were filtered, retaining only those where q0 was <0.5 and e-val1 was <0.05. After filtering,  
244 676 duplicate sequences remained, with a total length of 9,198,900 bp (**Supplementary Table**  
245 **S12**). Further analysis showed that 101 duplications located at the end of scaffolds (5% of the  
246 total length in both ends). And there were 136 genes present in the duplicated regions, these  
247 genes mainly involved in basic biological processes such as ribonucleoside binding,  
248 phosphatase activity, and protein dephosphorylation.

249

### 250 **Non-coding RNA prediction**

251 Non-coding RNAs included ribosomal RNAs (rRNAs), transfer RNAs (tRNAs),  
252 microRNAs (miRNAs), and small nuclear RNAs (snRNAs). Non-coding RNAs primarily  
253 regulate biological processes. Using BLASTN (BLASTN, RRID:SCR\_001598) with an E-  
254 value of 1E-10, we identified four rRNAs in the *R. roxellana* genome homologous to human  
255 rRNAs: 28S, 18S, 5.8S, and 5S (GenBank accession numbers NR\_003287.2, NR\_003286.2,  
256 NR\_003285.2, and NR\_023363.1, respectively). We also searched for miRNAs and snRNAs  
257 in the new genome using INFERNAL v1.1rc4 (Infernal, RRID:SCR\_011809) [36] against the  
258 Rfam database release 13.0 [37]. The tRNAs were predicted by tRNAscan-SE 1.3.1

259 (tRNAscan-SE, RRID:SCR\_010835) [38]. We identified 608 rRNAs, 17,813 miRNAs, 3,656  
260 snRNAs, and 460 tRNAs in the *R. roxellana* genome (**Supplementary Table S13**).

261

## 262 **Gene prediction and functional annotation**

263 We predicted genes using a combination of approaches: *de novo*, homology prediction,  
264 and transcriptome. For *ab initio* predictions of protein-coding genes, we used Augustus v3.2.2  
265 (Augustus, RRID:SCR\_008417) [39], with parameters “--uniqueGeneId = true --  
266 noInFrameStop = true --gff3 = on --genemodel = complete --strand = both”; GlimmeHMM  
267 v3.0.1 [40], with parameters “-g -f”; GENSCAN (GENSCAN, RRID:SCR\_012902) [41],  
268 GENEID [42], and SNAP v2013-11-29 [43].

269 Next, we predicted genes using homology-based approach. Protein sequences from five  
270 homologous species (*Homo sapiens*, *Gorilla gorilla*, *Macaca mulatta*, *Rhinopithecus bieti*, and  
271 *Rhinopithecus roxellana hubeiensis*) were downloaded from Ensemble Release 75  
272 (<http://www.ensembl.org/info/data/ftp/index.html>). We compared these sequences to the  
273 repeat-masked *R. roxellana* genome using TBLASTN (TBLASTN, RRID:SCR\_011822, -p  
274 tblastn -e 1e-05 -F T -m 8 -d) against the repeat-masked genome sequences [44], with  
275 parameters “-p tblastn -e 1e-05 -F T -m 8 -d.” The identified homologous genome sequences  
276 were annotated using GeneWise (Version 2.4.1, GeneWise, RRID:SCR\_015054) [45], with  
277 the parameters “-tfor -genesf -gff.”

278 Finally, we estimated genes based on transcriptome data. High-quality RNAs from the  
279 heart and skin tissue of the *R. roxellana qinlingensis* specimen (the same individual used for  
280 DNA sequencing and reference assembly) were sequenced on an Illumina Novaseq 6000  
281 platform. RNA-seq reads were assembled using trinityrnaseq-2.1.1 [46], with the parameters  
282 “--seqType fq --CPU 20 --max\_memory 200G --normalize\_reads --full\_cleanup --min\_glue 2  
283 --min\_kmer\_cov 2 --KMER\_SIZE 25.” To identify validate transcripts, the assembled  
284 transcript sequences were aligned to the *R. roxellana* genome using Assemble Spliced  
285 Alignment (PASA) [47], with default parameters. We estimated transcript expression levels  
286 using Tophat 2.0.13 (TopHat, RRID:SCR\_013035) [48] (with the parameters “-p 6 --max-  
287 intron-length 500000 -m 2 --library-type fr-unstranded”) and Cufflinks (Cufflinks,  
288 RRID:SCR\_014597) [49].

289 The genes predicted by each of the three approaches were merged using  
290 EVIDENCEModeler (EVIDENCEModeler, RRID:SCR\_014659) [50] with the parameters “--  
291 segmentSize 200000 --overlapSize 20000.” We weighted transcript predictions most highly,  
292 followed by homology-based predictions and *ab initio* predictions. Untranslated regions and  
293 alternative splicing of the predicted gene were explored using PASA, in conjunction with the  
294 transcriptome data [47]. In total, 22,497 genes were predicted in the *R. roxellana* genome  
295 (**Table 3**), each containing an average of 7.71 exons. The detailed results of the gene prediction  
296 process are given in **Table 3** and **Fig. 3**.

297 We also compared the gene structure, including mRNA length, exon length, intron length,  
298 and exon number, among *R. roxellana* and other representative primates (e.g., *Homo sapiens*,  
299 *Gorilla gorilla*, *Macaca mulatta*, *Rhinopithecus bieti*, and *Rhinopithecus roxellana hubeiensis*).  
300 We found that genome assembly patterns were similar among *R. roxellana* and the other  
301 primates (**Supplementary Fig. S2**).

302 To better understand the biological functions of the predicted genes, we used BLASTP  
303 (BLASTP, RRID:SCR\_001010, with an E-value of 1E-5) to identify the best match for each  
304 predicted gene across several databases, including the NCBI nonredundant protein database  
305 (NR v20180129), SwissProt (v20150821) [51], Kyoto Encyclopedia of Genes and Genomes  
306 (KEGG v20160503) [52], InterPro v29.0 (InterPro, RRID:SCR\_006695) [53], Pfam v31.0  
307 (Pfam, RRID:SCR\_004726) [54], and GO (Gene Ontology)[55]. In this way, 22,053 predicted  
308 genes (98.42%) were functionally annotated (**Supplementary Table S14**). Nearly half (10,670  
309 of 22,497) of these genes were annotated to the predicted proteins in NR database derived from  
310 the previous genome annotation for *Rhinopithecus roxellana*.

311 In addition, we estimated the genome assembly completeness using transcriptome data. The  
312 transcripts were derived from the *de novo* assembly with trinityrnaseq-2.1.1 mentioned above.  
313 Those transcripts were clustered into unigenes with the help of using TGICL (TIGR gene  
314 indices clustering program, v2.1) [56] with 95% identity similarity cut-off. The generated  
315 unigenes were aligned to our assembly version and previous version using BLAT v. 36 (BLAT,

316 RRID:SCR\_011919). Results showed that the completeness degree (percentage of unigenes  
317 aligned to a single scaffold in genome) was higher in our assembly (95.35%) compared with  
318 that in previous assembly (89.28%) for unigenes larger than 1000 bp (**Supplementary Table**  
319 **S15**), demonstrating the contiguity of our new assembly.

320

### 321 **Phylogenetic analysis and gene family estimation**

322 The coding regions and protein sequences of 11 representative mammals were downloaded  
323 from Ensembl (Ensembl Release 75). For genes with multiple transcript isoforms, the longest  
324 was chosen. Treefam [57] was used to estimate gene families. Using an all-to-all blast, we  
325 identified 17,560 gene families. We reconstructed the phylogenetic relationships among *R.*  
326 *roxellana* and other mammals based on four-fold degenerate sites extracted from the 5,418  
327 single-copy gene families. Phym1 v3.2 (PhyML, RRID:SCR\_014629) [58] was used to  
328 construct a maximum-likelihood tree using the GTR + gamma model, as inferred by  
329 JMODELTEST v2.1.10 (jModelTest, RRID:SCR\_015244) [59]. We estimated divergence  
330 times with MCMCTREE in PAML v4.8 (PAML, RRID:SCR\_014932) [60], using the  
331 Bayesian method and the fossil calibration times from timetree (<http://www.timetree.org/>) [61].  
332 The following fossil calibrations were used: *H. sapiens* vs. *Callithrix jacchus* (40.6–45.7 MYA,  
333 million years ago); *Homo sapiens* vs. *Pan troglodytes* (~6.2–7 MYA); *Homo sapiens* vs. *Mus*  
334 *musculus* (85–94 MYA); and *Homo sapiens* vs. *Tarsius syrichta* (~71–77 MYA). The

335 reconstructed phylogeny recovered a close relationship between *R. rollexana* and *M. mulatta*.

336 We estimated that *R. rollexana* and *M. mulatta* diverged approximately 13.4 MYA (**Fig. 4**).

337 To investigate the evolutionary history of *R. r.*, we estimated the expansion and  
338 contraction of gene family in this species with CAFE 3.0 (CAFÉ, RRID:SCR\_005983) [62]. A  
339 random birth and death model was used to study gene family variations along each lineage in  
340 the phylogenetic tree. This analysis identified 993 expanded gene families and 2,745 contracted  
341 gene families in the *R. roxellana* genome (**Fig. 4**). To determine the significance of each gene  
342 family, *P*-values in each lineage were estimated by comparing conditional likelihoods derived  
343 from a probabilistic graphical model (PGM). All gene family with *P*-values < 0.05 were further  
344 analyzed. To explore the significantly expanded gene families, we performed a GO-term  
345 enrichment analysis with EnrichPipeline32 [63, 64], using the 1,370 genes belonging to the  
346 314 significantly expanded gene families as input, and using all predicted genes as background.  
347 We considered GO term significant if adjusted the *P*-value was <0.05. We found that the  
348 significantly expanded gene families were mainly associated with the hemoglobin complex,  
349 energy metabolism, and oxygen transport (**Supplementary Table S16**).

350

## 351 **Conclusion**

352 In this study, we generated a high-quality genome assembly for the golden snub-nosed  
353 monkey (*R. roxellana*) using a combination of five advanced genomics technologies. Our

354 results will inform studies of the origin and evolutionary history of the snub-nosed monkey. In  
355 addition, this genome may provide a framework within which to survey the mechanisms  
356 underlying the formation of the distinct morphological and sociological characters of *R.*  
357 *roxellana*. This genome may also stimulate new insights into the improvement of strategies to  
358 conserve and manage this endangered species. Finally, this genome, which has superior  
359 continuity and accuracy, may serve as a new standard reference genome for colobine primates.

### 360 **Declarations**

### 361 **Availability of supporting data**

362 The raw data discussed in this publication have been deposited in NCBI's short read archive  
363 under the accession number PRJNA524949. All supporting data and materials and a JBrowse  
364 genome browser are available in the *GigaScience* GigaDB database [65].

### 365 **Competing interests**

366 The authors declare that they have no competing interests.

### 367 **Funding**

368 This work was financially supported by Strategic Priority Research Program of the Chinese  
369 Academy of Sciences (XDB31020302), the National Natural Science Foundation of China  
370 (31622053), the Promotional project for Innovation team, the Department of Science and  
371 Technology of Shaanxi Prov. China (2018TD-017), and the National Key Programme of



372 Research and Development, the Ministry of Science and Technology of China  
373 (2016YFC0503200).

374

### 375 **Abbreviations**

376 Gb: gigabase; kb: kilobase; Mb: megabase; PE: paired-end; PacBio: Pacific Biosciences;  
377 SMRT: single molecule real-time sequencing; Hi-C: high-throughput chromosome  
378 conformation capture; BUSCO: Benchmarking Universal Single-copy Orthologs; GEGMA:  
379 core eukaryotic gene-mapping approach; GO: gene ontology; TFS: transposable element;  
380 TRF: Tandem Repeat Finder; SINES: Short interspersed nuclear elements; LINEs: long  
381 interspersed nuclear elements; PASA: genome by Assemble Spliced Alignment; NR: NCBI  
382 nonredundant protein database; KEGG: Kyoto Encyclopedia of Genes and Genomes. Mya:  
383 million years ago.

### 384 **Author contributions**

385 X.G.Q. conceived and designed the project, L.W., J.W.W. contributed to the work on genomic  
386 sequencing and performing data analyses. J.W.W., L.W. and X.G.Q. wrote the manuscript.  
387 B.G.L. helped with sample collection. All authors provided input for the paper and approved  
388 the final version.

### 389 **Acknowledgements**

390 We thank Mr. Yiliang Xu, Mr. Qiqi Liang, Mrs. Yue Xie from Novogene for their technical  
391 support. Mr. Xuanmin Guang and Mr. Chi Zhang from BGI for their assistance in data analysis.  
392 We thank to Mr. Ruliang Pan for his gracious help polishing the language. We are also grateful  
393 to Mr. Yinghu Lei from Louguantai Breeding Center, Dr. Zhipang Huang, and Dr. Pei Zhang  
394 from Northwest University for their helping with the sampling collection. We specially  
395 appreciate Prof. Zhengbing Wang, and Prof. Jiang Chang from Discipline Development  
396 Department of Northwest University for their support. This study was supported by through  
397 the Discipline Construction Project of Northwest University.

398

## 399 **Figures and tables**

### 400 **Figure legends:**

401 **Fig. 1. Image of *R. roxellana*, taken in the Qinling Mountain, China.**

402 **Fig. 2. Hi-C heatmap of interactions between pairs of chromosomal loci throughout the**

403 **genome.** Hi-C interactions within and among *R. roxellana* chromosomes (Chr 1– Chr 22);

404 interactions were drawn based on the chromatin interaction frequencies between pairs of 100-

405 kb genomic regions (as determined by Hi-C). In principle, darker red cells indicate stronger

406 and more frequent interactions, which in turn imply that the two sequences are spatially close.

407 **Fig. 3. Gene predictions.** (a) Number of genes estimated by various prediction approaches: *de*

408 *novo* (blue), homologys (pink), and RNA-seq data (green). The labels rna\_0.5, denove\_0.5,

409 and homology\_0.5 indicate the genes predicted by each method with an overlap >50%. (b)  
410 Number of genes predicted based on *de novo*, homology, and RNA-seq approaches, in addition  
411 to expression level (in rpkm). The labels rna\_0.5, denove\_0.5, and homology\_0.5 indicate the  
412 genes predicted by each method with an overlap >50%, while rpkm>1 indicates those genes  
413 with a relative expression level >1.

414 **Fig. 4. *R. roxellana* phylogenetic relationships and gene families.** Phylogenetic relationships  
415 were inferred from 5,418 single-copy gene families in *R. roxellana* and other mammals. All  
416 nodes had support values of 100%. Estimated divergence times are given near each node.  
417 Numbers under each species indicate the number of gene families that have been expanded  
418 (green) and contracted (light yellow) since the split of species from the most recent common  
419 ancestor (MRCA). The numbers on each branch correspond to the numbers of gene families  
420 that have been expanded (red) and contracted (green) in the mammalian genome. Those monkey  
421 images are copyright 2013 Stephen D. Nash of the IUCN SSC Primate Specialist Group and  
422 are used with permission. MYA: million years ago.

423

424 **Table 1. Reads generated by the five sequencing methods.**

| Paired-end libraries | Insert size (bp) | Total clean data (Gb) | Read length (bp) | Sequence coverage (X) |
|----------------------|------------------|-----------------------|------------------|-----------------------|
| Illumina             | 350              | 423.32                | 150              | 133.12                |
| Pacbio               | 20 k             | 304.84                | n/a              | 95.86                 |
| 10X Genomics         | 500–700          | 348.41                | 150              | 109.56                |
| BioNano              | n/a              | 463.75                | n/a              | n/a                   |
| Hi-C                 | 350              | 310.92                | n/a              | 97.77                 |
| Total                | n/a              | 1,851.24              | n/a              | 582.15                |

425 Note: The sequence coverage was calculated based on an estimated genome size of 3.18 Gb.

426 n/a: not applicable.

427

428 **Table 2. Summary of the final *R. roxellana* genome assembly.**

| Category | Contig        |        | Scaffold      |        |
|----------|---------------|--------|---------------|--------|
|          | Length (bp)   | Number | Length (bp)   | Number |
| Total    | 3,038,184,325 | 6,099  | 3,038,467,325 | 3,269  |
| Max      | 30,757,641    | n/a    | 206,558,726   | n/a    |
| ≥2000 bp | n/a           | 5,708  | n/a           | 2,879  |
| N50      | 5,723,610     | 151    | 144,559,847   | 9      |
| N60      | 4,241,389     | 211    | 141,075,955   | 11     |
| N70      | 3,173,235     | 292    | 135,203,321   | 14     |
| N80      | 2,063,823     | 408    | 118,350,466   | 16     |
| N90      | 896,517       | 622    | 83,045,532    | 19     |

429 Note: The “Number” column represents the number of contigs/scaffolds longer than the value  
 430 of the corresponding category. n/a: not applicable.

431

432

433 **Table 3. Summary and characteristics of the predicted protein-coding genes.**

| Gene set            | Number  | Average transcript length (bp) | Average CDS length (bp) | Average exon length (bp) | Average intron length (bp) | Average exons per gene |
|---------------------|---------|--------------------------------|-------------------------|--------------------------|----------------------------|------------------------|
| Augustus            | 32,928  | 23,441                         | 1,052                   | 196                      | 5,112                      | 5.38                   |
| GlimmerHMM          | 618,957 | 4,204                          | 404                     | 166                      | 2,654                      | 2.43                   |
| <i>De novo</i> SNAP | 97,298  | 49,851                         | 755                     | 144                      | 1,1597                     | 5.23                   |
| Geneid              | 36,863  | 35,242                         | 1,035                   | 188                      | 7,615                      | 5.49                   |
| Genscan             | 50,419  | 40,635                         | 1,137                   | 167                      | 6,800                      | 6.81                   |
| Ggo                 | 25,281  | 19,893                         | 1,055                   | 184                      | 3,971                      | 5.74                   |
| Hsa                 | 38,444  | 14,763                         | 826                     | 182                      | 3,942                      | 4.54                   |
| Homology Mmu        | 21,959  | 29,709                         | 1,470                   | 187                      | 4,123                      | 7.85                   |
| Rbi                 | 25,320  | 25,685                         | 1,387                   | 196                      | 3,991                      | 7.09                   |
| Rro                 | 24,121  | 28,439                         | 1,420                   | 185                      | 4,043                      | 7.68                   |
| RNASeq PASA         | 66,620  | 28,449                         | 1,219                   | 164                      | 4,247                      | 7.41                   |
| Cufflinks           | 73,199  | 31,497                         | 2,737                   | 409                      | 5,052                      | 6.69                   |
| EVM                 | 30,102  | 22,298                         | 1,098                   | 182                      | 4,199                      | 6.05                   |
| Pasa-update*        | 29,403  | 27,638                         | 1,180                   | 181                      | 4,782                      | 6.53                   |
| Final set*          | 22,497  | 34,153                         | 1,369                   | 178                      | 4,885                      | 7.71                   |

434 Note: Pasa-update\* includes only the untranslated regions; other regions were not included.

435 Final set\* represents the results after the Pasa filtering process, where the longest isoform was

436 chosen if the case of multiple splicing isoforms; redundant single exons were also discarded.

437 The “Number” column gives the number of protein-coding genes predicted by each method.

438

439

440

441

442 **Supplementary files:**

443 **Supplementary Fig. S1.** Genome size estimation using the k-mer method.

444 **Supplementary Fig. S2.** Comparisons of each element among genomes of homologous  
445 species.

446 **Supplementary Table S1.** The contig assembly based on PacBio subreads.

447 **Supplementary Table S2.** The scaffold assembly based on sspace-longreads results.

448 **Supplementary Table S3.** The assembly after gap-filling.

449 **Supplementary Table S4.** The assembly based on BioNano optical map data.

450 **Supplementary Table S5.** The assembly based on 10X Genomics linked reads.

451 **Supplementary Table S6.** The read mapping rate and the coverage of the assembled genome  
452 determined with BWA.

453 **Supplementary Table S7.** The SNPs identified in the genome of *R. roxellana*.

454 **Supplementary Table S8.** Genome assessment based on BUSCO annotations.

455 **Supplementary Table S9.** Genome assessment based on CEGMA annotations.

456 **Supplementary Table S10.** Prediction of repeat elements prediction in the genome assembly.

457 **Supplementary Table S11.** Prediction of repetitive sequences in the genome assembly.

458 **Supplementary Table S12.** The duplicated sequences (DS) identified in the genome assembly.



459 **Supplementary Table S13.** Summary and characteristics of the predicted RNAs.

460 **Supplementary Table S14.** The functional annotations of the genes predicted in the *R.*  
461 *roxellana* genome.

462 **Supplementary Table S15.** Assessment of the new genome assembly using unigene  
463 sequences

464 **Supplementary Table S16.** The GO annotations of the expanded gene families in the *R.*  
465 *roxellana* genome (adjusted *P*-value < 0.05)

466

#### 467 **References**

- 468 1. Li BG, Pan RL, Oxnard CE. Extinction of snub-nosed monkeys in China during the  
469 past 400 years. *Int J Primatol*, 2002; **23**(6):1227-1244.
- 470 2. Luo MF, Liu ZJ, Pan HJ, Zhao L, Li M. Historical geographic dispersal of the golden  
471 snub-nosed monkey (*Rhinopithecus roxellana*) and the influence of climatic  
472 oscillations. *Am J Primatol*, 2012; **74**(2):91-101.
- 473 3. Fang G, Li M, Liu X-J, Guo W-J, Jiang Y-T, Huang Z-P, Tang S-Y, Li D-Y, Yu J, Jin  
474 T *et al.* Preliminary report on Sichuan golden snub-nosed monkeys (*Rhinopithecus*  
475 *roxellana roxellana*) at Laohegou Nature Reserve, Sichuan, China. *Sci Rep*, 2018;  
476 **8**(1):16183.
- 477 4. Grueter CC, Qi X, Li B, Li M. Multilevel societies. *Curr Biol*, 2017; **27**(18):R984-  
478 R986.
- 479 5. Qi XG, Li BG, Garber PA, Ji WH, Watanabe K. Social dynamics of the golden snub-  
480 nosed monkey (*Rhinopithecus roxellana*): female transfer and one-male unit  
481 succession. *Am J Primatol*, 2009; **71**(8):670-679.
- 482 6. Li H, Meng S-J, Men Z-M, Fu Y-X, Zhang Y-P. Genetic diversity and population  
483 history of golden monkeys (*Rhinopithecus roxellana*). *Genetics*, 2003; **164**(1):269-  
484 275.
- 485 7. Qi X-G, Garber PA, Ji W, Huang Z-P, Huang K, Zhang P, Guo S-T, Wang X-W, He  
486 G, Zhang P *et al.* Satellite telemetry and social modeling offer new insights into the  
487 origin of primate multilevel societies. *Nat Commun*, 2014; **5**:5296.

- 488 8. Zhou X, Wang B, Pan Q, Zhang J, Kumar S, Sun X, Liu Z, Pan H, Lin Y, Liu G *et al.*  
489 Whole-genome sequencing of the snub-nosed monkey provides insights into folivory  
490 and evolutionary history. *Nat Genet*, 2014; **46**:1303-1310.
- 491 9. Kuang W-M, Ming C, Li H-P, Wu H, Frantz L, Roos C, Zhang Y-P, Zhang C-L, Jia  
492 T, Yang J-Y *et al.* The origin and population history of the endangered golden snub-  
493 nosed monkey (*Rhinopithecus roxellana*). *Mol Biol Evol*, 2018:msy220-msy220.
- 494 10. Hong YY, Duo HR, Hong JY, Yang JY, Liu SM, Yu LH, Yi TY. Resequencing and  
495 comparison of whole mitochondrial genome to gain insight into the evolutionary  
496 status of the Shennongjia golden snub-nosed monkey (*SNJ R-roxellana*). *Ecol Evol*,  
497 2017; **7**(12):4456-4464.
- 498 11. Seo JS, Rhie A, Kim J, Lee S, Sohn MH, Kim CU, Hastie A, Cao H, Yun JY, Kim J  
499 *et al.* De novo assembly and phasing of a Korean human genome. *Nature*, 2016;  
500 **538**(7624):243-247.
- 501 12. Chaisson MJ, Wilson RK, Eichler EE. Genetic variation and the de novo assembly of  
502 human genomes. *Nat Rev Genet*, 2015; **16**(11):627-640.
- 503 13. Jiao YP, Peluso P, Shi JH, Liang T, Stitzer MC, Wang B, Campbell MS, Stein JC,  
504 Wei XH, Chin CS *et al.* Improved maize reference genome with single-molecule  
505 technologies. *Nature*, 2017; **546**(7659):524-527.
- 506 14. Gordon D, Huddleston J, Chaisson MJP, Hill CM, Kronenberg ZN, Munson KM,  
507 Malig M, Raja A, Fiddes I, Hillier LW *et al.* Long-read sequence assembly of the  
508 gorilla genome. *Science*, 2016; **352**(6281):aae0344.
- 509 15. Kronenberg ZN, Fiddes IT, Gordon D, Murali S, Cantsilieris S, Meyerson OS,  
510 Underwood JG, Nelson BJ, Chaisson MJP, Dougherty ML *et al.* High-resolution  
511 comparative analysis of great ape genomes. *Science*, 2018; **360**(6393):eaar6343.
- 512 16. Bickhart DM, Rosen BD, Koren S, Sayre BL, Hastie AR, Chan S, Lee J, Lam ET,  
513 Liachko I, Sullivan ST *et al.* Single-molecule sequencing and chromatin conformation  
514 capture enable de novo reference assembly of the domestic goat genome. *Nat Genet*,  
515 2017; **49**:643-650.
- 516 17. Luo R, Liu B, Xie Y, Li Z, Huang W, Yuan J, He G, Chen Y, Pan Q, Liu Y *et al.*  
517 SOAPdenovo2: an empirically improved memory-efficient short-read de novo  
518 assembler. *Gigascience*, 2012; **1**(1):18.
- 519 18. Martin M. Cutadapt removes adapter sequences from high-throughput sequencing  
520 reads. *EMBnetjournal*, 2011; **17**:10 -12.
- 521 19. Chin CS, Peluso P, Sedlazeck FJ. Phased diploid genome assembly with single-  
522 molecule real-time sequencing. *Nat Methods*, 2016; **13**(12):1050-1054.
- 523 20. Chin CS, Alexander DH, Marks P, Klammer AA, Drake J, Heiner C, Clum A,  
524 Copeland A, Huddleston J, Eichler EE *et al.* Nonhybrid, finished microbial genome  
525 assemblies from long-read SMRT sequencing data. *Nat Methods*, 2013; **10**(6):563-+.

- 526 21. Walker BJ, Abeel T, Shea T, Priest M, Abouelliel A, Sakthikumar S, Cuomo CA,  
527 Zeng QD, Wortman J, Young SK *et al.* Pilon: An Integrated Tool for Comprehensive  
528 Microbial Variant Detection and Genome Assembly Improvement. *Plos One*, 2014;  
529 **9**(11).
- 530 22. Boetzer M, Pirovano W. SSPACE-LongRead: scaffolding bacterial draft genomes  
531 using long read sequence information. *BMC Bioinformatics*, 2014; **15**:211.
- 532 23. English AC, Richards S, Han Y, Wang M, Vee V, Qu J, Qin X, Muzny DM, Reid JG,  
533 Worley KC *et al.* Mind the gap: upgrading genomes with Pacific Biosciences RS  
534 long-read sequencing technology. *Plos One*, 2012; **7**(11):e47768.
- 535 24. Shelton JM, Coleman MC, Herndon N, Lu N, Lam ET, Anantharaman T, Sheth P,  
536 Brown SJ. Tools and pipelines for BioNano data: molecule assembly pipeline and  
537 FASTA super scaffolding tool. *BMC Genomics*, 2015; **16**:734-734.
- 538 25. Langmead B, Trapnell C, Pop M, Salzberg SL. Ultrafast and memory-efficient  
539 alignment of short DNA sequences to the human genome. *Genome Biol*, 2009;  
540 **10**(3):R25.
- 541 26. Adey A, Kitzman JO, Burton JN, Daza R, Kumar A, Christiansen L, Ronaghi M,  
542 Amini S, Gunderson KL, Steemers FJ *et al.* In vitro, long-range sequence information  
543 for de novo genome assembly via transposase contiguity. *Genome Res*, 2014;  
544 **24**(12):2041-2049.
- 545 27. Li H, Durbin R. Fast and accurate short read alignment with Burrows-Wheeler  
546 transform. *Bioinformatics*, 2009; **25**(14):1754-1760.
- 547 28. Burton JN, Adey A, Patwardhan RP, Qiu R, Kitzman JO, Shendure J. Chromosome-  
548 scale scaffolding of de novo genome assemblies based on chromatin interactions. *Nat*  
549 *Biotechnol*, 2013; **31**(12):1119-1125.
- 550 29. Kurtz S, Phillippy A, Delcher AL, Smoot M, Shumway M, Antonescu C, Salzberg  
551 SL. Versatile and open software for comparing large genomes. *Genome Biol*, 2004;  
552 **5**(2):R12.
- 553 30. Simao FA, Waterhouse RM, Ioannidis P, Kriventseva EV, Zdobnov EM. BUSCO:  
554 assessing genome assembly and annotation completeness with single-copy orthologs.  
555 *Bioinformatics*, 2015; **31**(19):3210-3212.
- 556 31. Parra G, Bradnam K, Korf I. CEGMA: a pipeline to accurately annotate core genes in  
557 eukaryotic genomes. *Bioinformatics*, 2007; **23**(9):1061-1067.
- 558 32. Jurka J, Kapitonov VV, Pavlicek A, Klonowski P, Kohany O, Walichiewicz J.  
559 Repbase Update, a database of eukaryotic repetitive elements. *Cytogenet Genome*  
560 *Res*, 2005; **110**(1-4):462-467.
- 561 33. Price AL, Jones NC, Pevzner PA. De novo identification of repeat families in large  
562 genomes. *Bioinformatics*, 2005; **21 Suppl 1**:i351-358.

- 563 34. Benson G. Tandem repeats finder: a program to analyze DNA sequences. *Nucleic*  
564 *Acids Res*, 1999; **27**(2):573-580.
- 565 35. Abyzov A, Urban AE, Snyder M, Gerstein M. CNVnator: an approach to discover,  
566 genotype, and characterize typical and atypical CNVs from family and population  
567 genome sequencing. *Genome Res*, 2011; **21**(6):974-984.
- 568 36. Nawrocki EP, Kolbe DL, Eddy SR. Infernal 1.0: inference of RNA alignments (vol  
569 25, pg 1335, 2009). *Bioinformatics*, 2009; **25**(13):1713-1713.
- 570 37. Griffiths-Jones S, Moxon S, Marshall M, Khanna A, Eddy SR, Bateman A. Rfam:  
571 annotating non-coding RNAs in complete genomes. *Nucleic Acids Res*, 2005;  
572 **33**:D121-D124.
- 573 38. Lowe TM, Eddy SR. tRNAscan-SE: a program for improved detection of transfer  
574 RNA genes in genomic sequence. *Nucleic Acids Res*, 1997; **25**(5):955-964.
- 575 39. Stanke M, Keller O, Gunduz I, Hayes A, Waack S, Morgenstern B. AUGUSTUS: ab  
576 initio prediction of alternative transcripts. *Nucleic Acids Res*, 2006; **34**:W435-W439.
- 577 40. Majoros WH, Pertea M, Salzberg SL. TigrScan and GlimmerHMM: two open source  
578 ab initio eukaryotic gene-finders. *Bioinformatics*, 2004; **20**(16):2878-2879.
- 579 41. Burge C, Karlin S. Prediction of complete gene structures in human genomic DNA. *J*  
580 *Mol Biol*, 1997; **268**(1):78-94.
- 581 42. Guigo R. Assembling genes from predicted exons in linear time with dynamic  
582 programming. *J Comput Biol*, 1998; **5**(4):681-702.
- 583 43. Korf I. Gene finding in novel genomes. *BMC Bioinformatics*, 2004; **5**:59.
- 584 44. Kent WJ. BLAT - The BLAST-like alignment tool. *Genome Res*, 2002; **12**(4):656-  
585 664.
- 586 45. Birney E, Clamp M, Durbin R. GeneWise and Genomewise. *Genome Res*, 2004;  
587 **14**(5):988-995.
- 588 46. Grabherr MG, Haas BJ, Yassour M, Levin JZ, Thompson DA, Amit I, Adiconis X,  
589 Fan L, Raychowdhury R, Zeng QD *et al*. Full-length transcriptome assembly from  
590 RNA-Seq data without a reference genome. *Nat Biotechnol*, 2011; **29**(7):644-U130.
- 591 47. Haas BJ, Delcher AL, Mount SM, Wortman JR, Smith RK, Hannick LI, Maiti R,  
592 Ronning CM, Rusch DB, Town CD *et al*. Improving the Arabidopsis genome  
593 annotation using maximal transcript alignment assemblies. *Nucleic Acids Res*, 2003;  
594 **31**(19):5654-5666.
- 595 48. Kim D, Pertea G, Trapnell C, Pimentel H, Kelley R, Salzberg SL. TopHat2: accurate  
596 alignment of transcriptomes in the presence of insertions, deletions and gene fusions.  
597 *Genome Biol*, 2013; **14**(4):R36.
- 598 49. Trapnell C, Roberts A, Goff L, Pertea G, Kim D, Kelley DR, Pimentel H, Salzberg  
599 SL, Rinn JL, Pachter L. Differential gene and transcript expression analysis of RNA-  
600 seq experiments with TopHat and Cufflinks. *Nat Protoc*, 2012; **7**(3):562-578.

- 601 50. Haas BJ, Salzberg SL, Zhu W, Pertea M, Allen JE, Orvis J, White O, Buell CR,  
602 Wortman JR. Automated eukaryotic gene structure annotation using  
603 EvidenceModeler and the program to assemble spliced alignments. *Genome Biol*,  
604 2008; **9**(1):R7.
- 605 51. Bairoch A, Apweiler R, Wu CH, Barker WC, Boeckmann B, Ferro S, Gasteiger E,  
606 Huang H, Lopez R, Magrane M *et al.* The Universal Protein Resource (UniProt).  
607 *Nucleic Acids Res*, 2005; **33**(Database issue):D154-D159.
- 608 52. Kanehisa M, Goto S. KEGG: kyoto encyclopedia of genes and genomes. *Nucleic*  
609 *Acids Res*, 2000; **28**(1):27-30.
- 610 53. Mitchell AL, Attwood TK, Babbitt PC, Blum M, Bork P, Bridge A, Brown SD,  
611 Chang HY, El-Gebali S, Fraser MI *et al.* InterPro in 2019: improving coverage,  
612 classification and access to protein sequence annotations. *Nucleic Acids Res*, 2019;  
613 **47**(D1):D351-D360.
- 614 54. Finn RD, Coghill P, Eberhardt RY, Eddy SR, Mistry J, Mitchell AL, Potter SC, Punta  
615 M, Qureshi M, Sangrador-Vegas A *et al.* The Pfam protein families database: towards  
616 a more sustainable future. *Nucleic Acids Res*, 2016; **44**(D1):D279-D285.
- 617 55. Ashburner M, Ball CA, Blake JA, Botstein D, Butler H, Cherry JM, Davis AP,  
618 Dolinski K, Dwight SS, Eppig JT *et al.* Gene Ontology: tool for the unification of  
619 biology. *Nat Genet*, 2000; **25**(1):25-29.
- 620 56. Pertea G, Huang X, Liang F, Antonescu V, Sultana R, Karamycheva S, Lee Y, White  
621 J, Cheung F, Parvizi B *et al.* TIGR Gene Indices clustering tools (TGICL): a software  
622 system for fast clustering of large EST datasets. *Bioinformatics*, 2003; **19**(5):651-652.
- 623 57. Li H, Coghlan A, Ruan J, Coin LJ, Heriche JK, Osmotherly L, Li RQ, Liu T, Zhang  
624 Z, Bolund L *et al.* TreeFam: a curated database of phylogenetic trees of animal gene  
625 families. *Nucleic Acids Res*, 2006; **34**:D572-D580.
- 626 58. Guindon S, Delsuc F, Dufayard J-F, Gascuel O: **Estimating maximum likelihood**  
627 **phylogenies with PhyML**. In: *Bioinformatics for DNA sequence analysis*. Springer;  
628 2009: 113-137.
- 629 59. Posada D. jModelTest: phylogenetic model averaging. *Mol Biol Evol*, 2008;  
630 **25**(7):1253-1256.
- 631 60. Yang Z. PAML 4: Phylogenetic Analysis by Maximum Likelihood. *Mol Biol Evol*,  
632 2007; **24**(8):1586-1591.
- 633 61. Kumar S, Stecher G, Suleski M, Hedges SB. TimeTree: A resource for timelines,  
634 timetrees, and divergence times. *Mol Biol Evol*, 2017; **34**(7):1812-1819.
- 635 62. De Bie T, Cristianini N, Demuth JP, Hahn MW. CAFE: a computational tool for the  
636 study of gene family evolution. *Bioinformatics*, 2006; **22**(10):1269-1271.

- 637 63. Huang da W, Sherman BT, Lempicki RA. Bioinformatics enrichment tools: paths  
638 toward the comprehensive functional analysis of large gene lists. *Nucleic Acids Res*,  
639 2009; **37**(1):1-13.
- 640 64. Beissbarth T, Speed TP. Gostat: find statistically overrepresented Gene Ontologies  
641 within a group of genes. *Bioinformatics*, 2004; **20**(9):1464-1465.
- 642 65. Wang L; Wu J; Liu X; Di D; Liang Y; Feng Y; Zhang S; Li B; Qi X (2019):  
643 Supporting data for "A high-quality genome assembly of the endangered golden snub-  
644 nosed monkey *Rhinopithecus roxellana*" GigaScience Database.  
645 <http://dx.doi.org/10.5524/100619>.

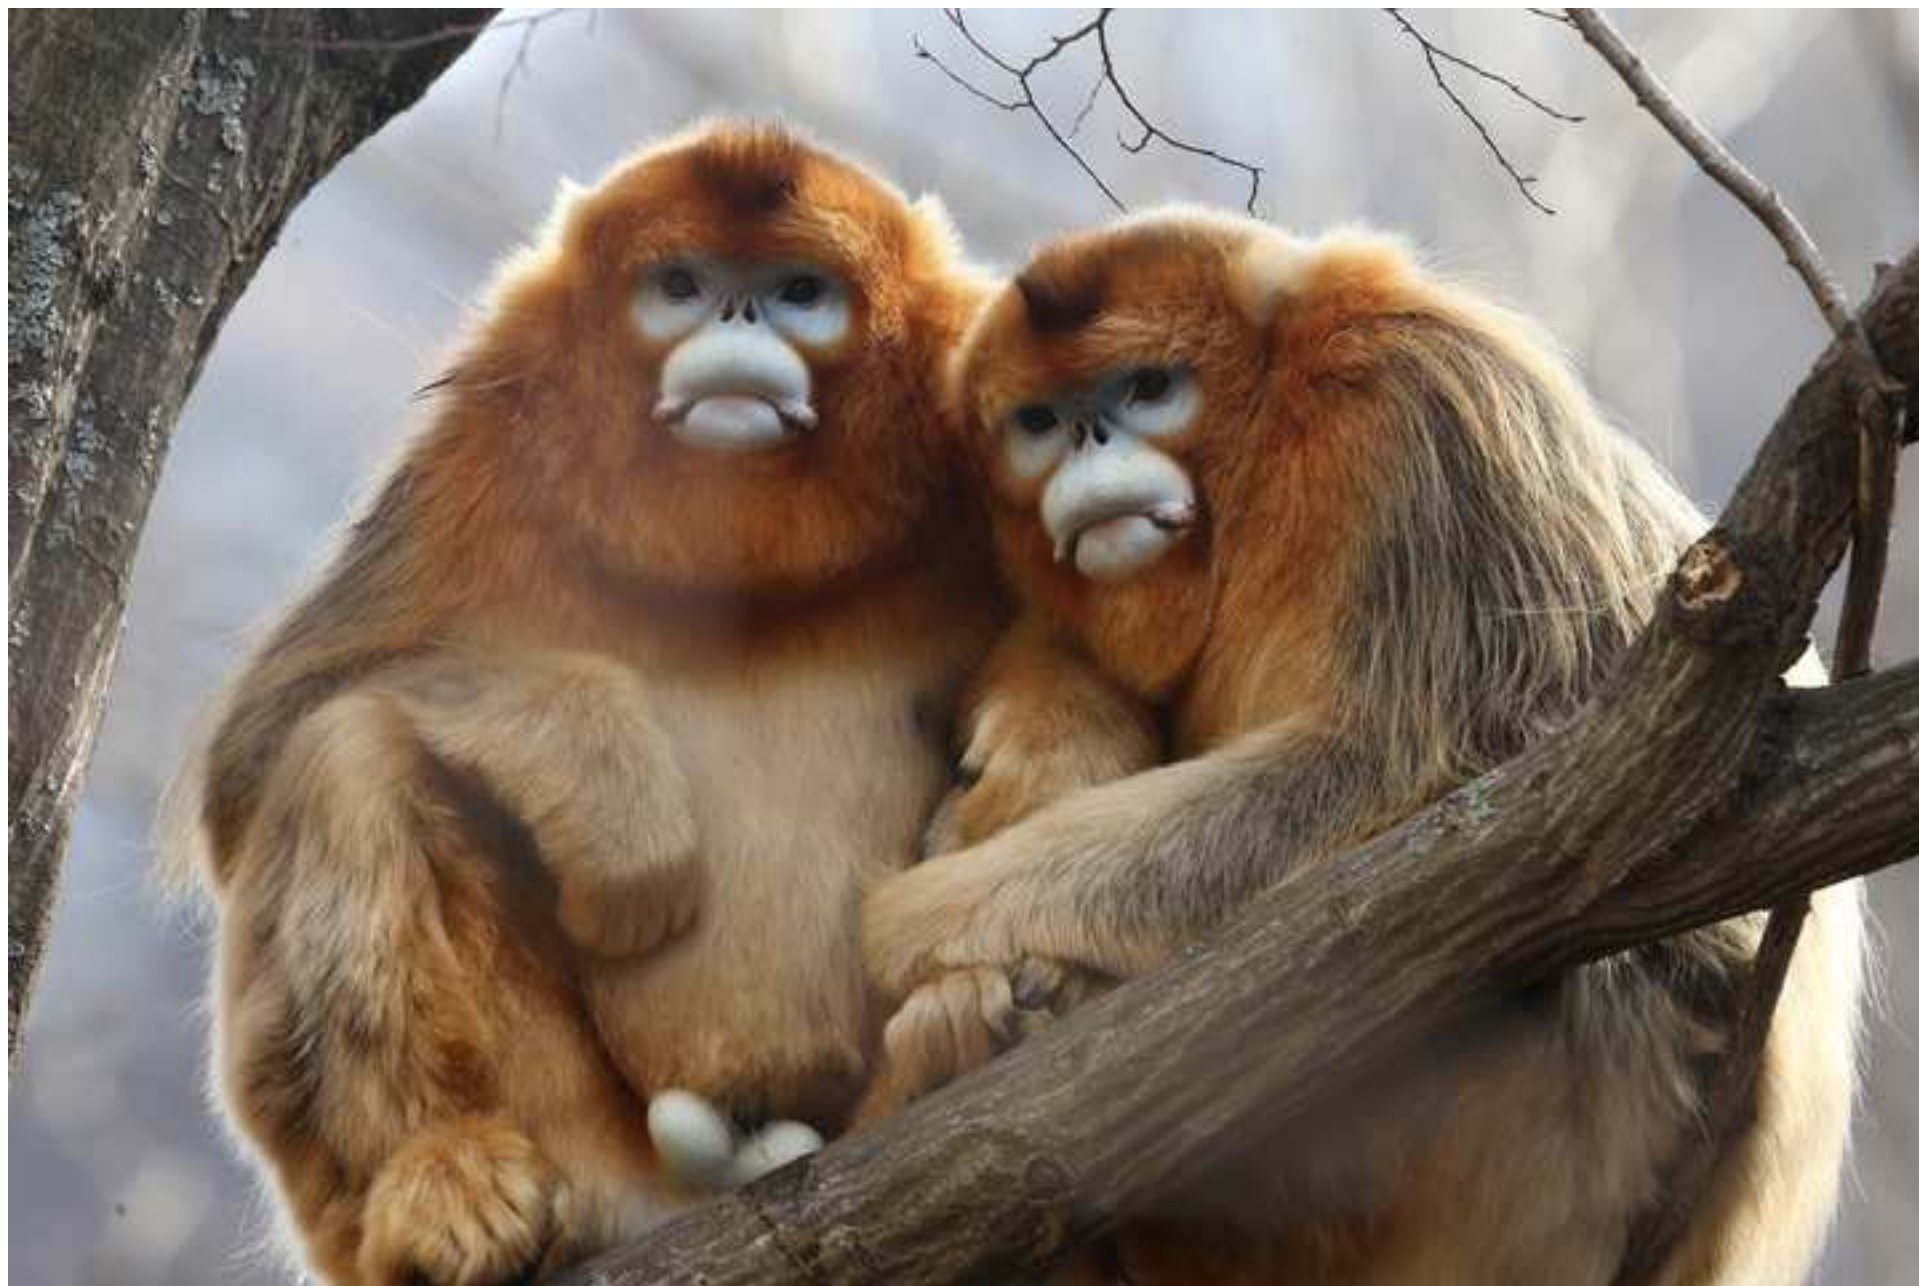



Figure 2

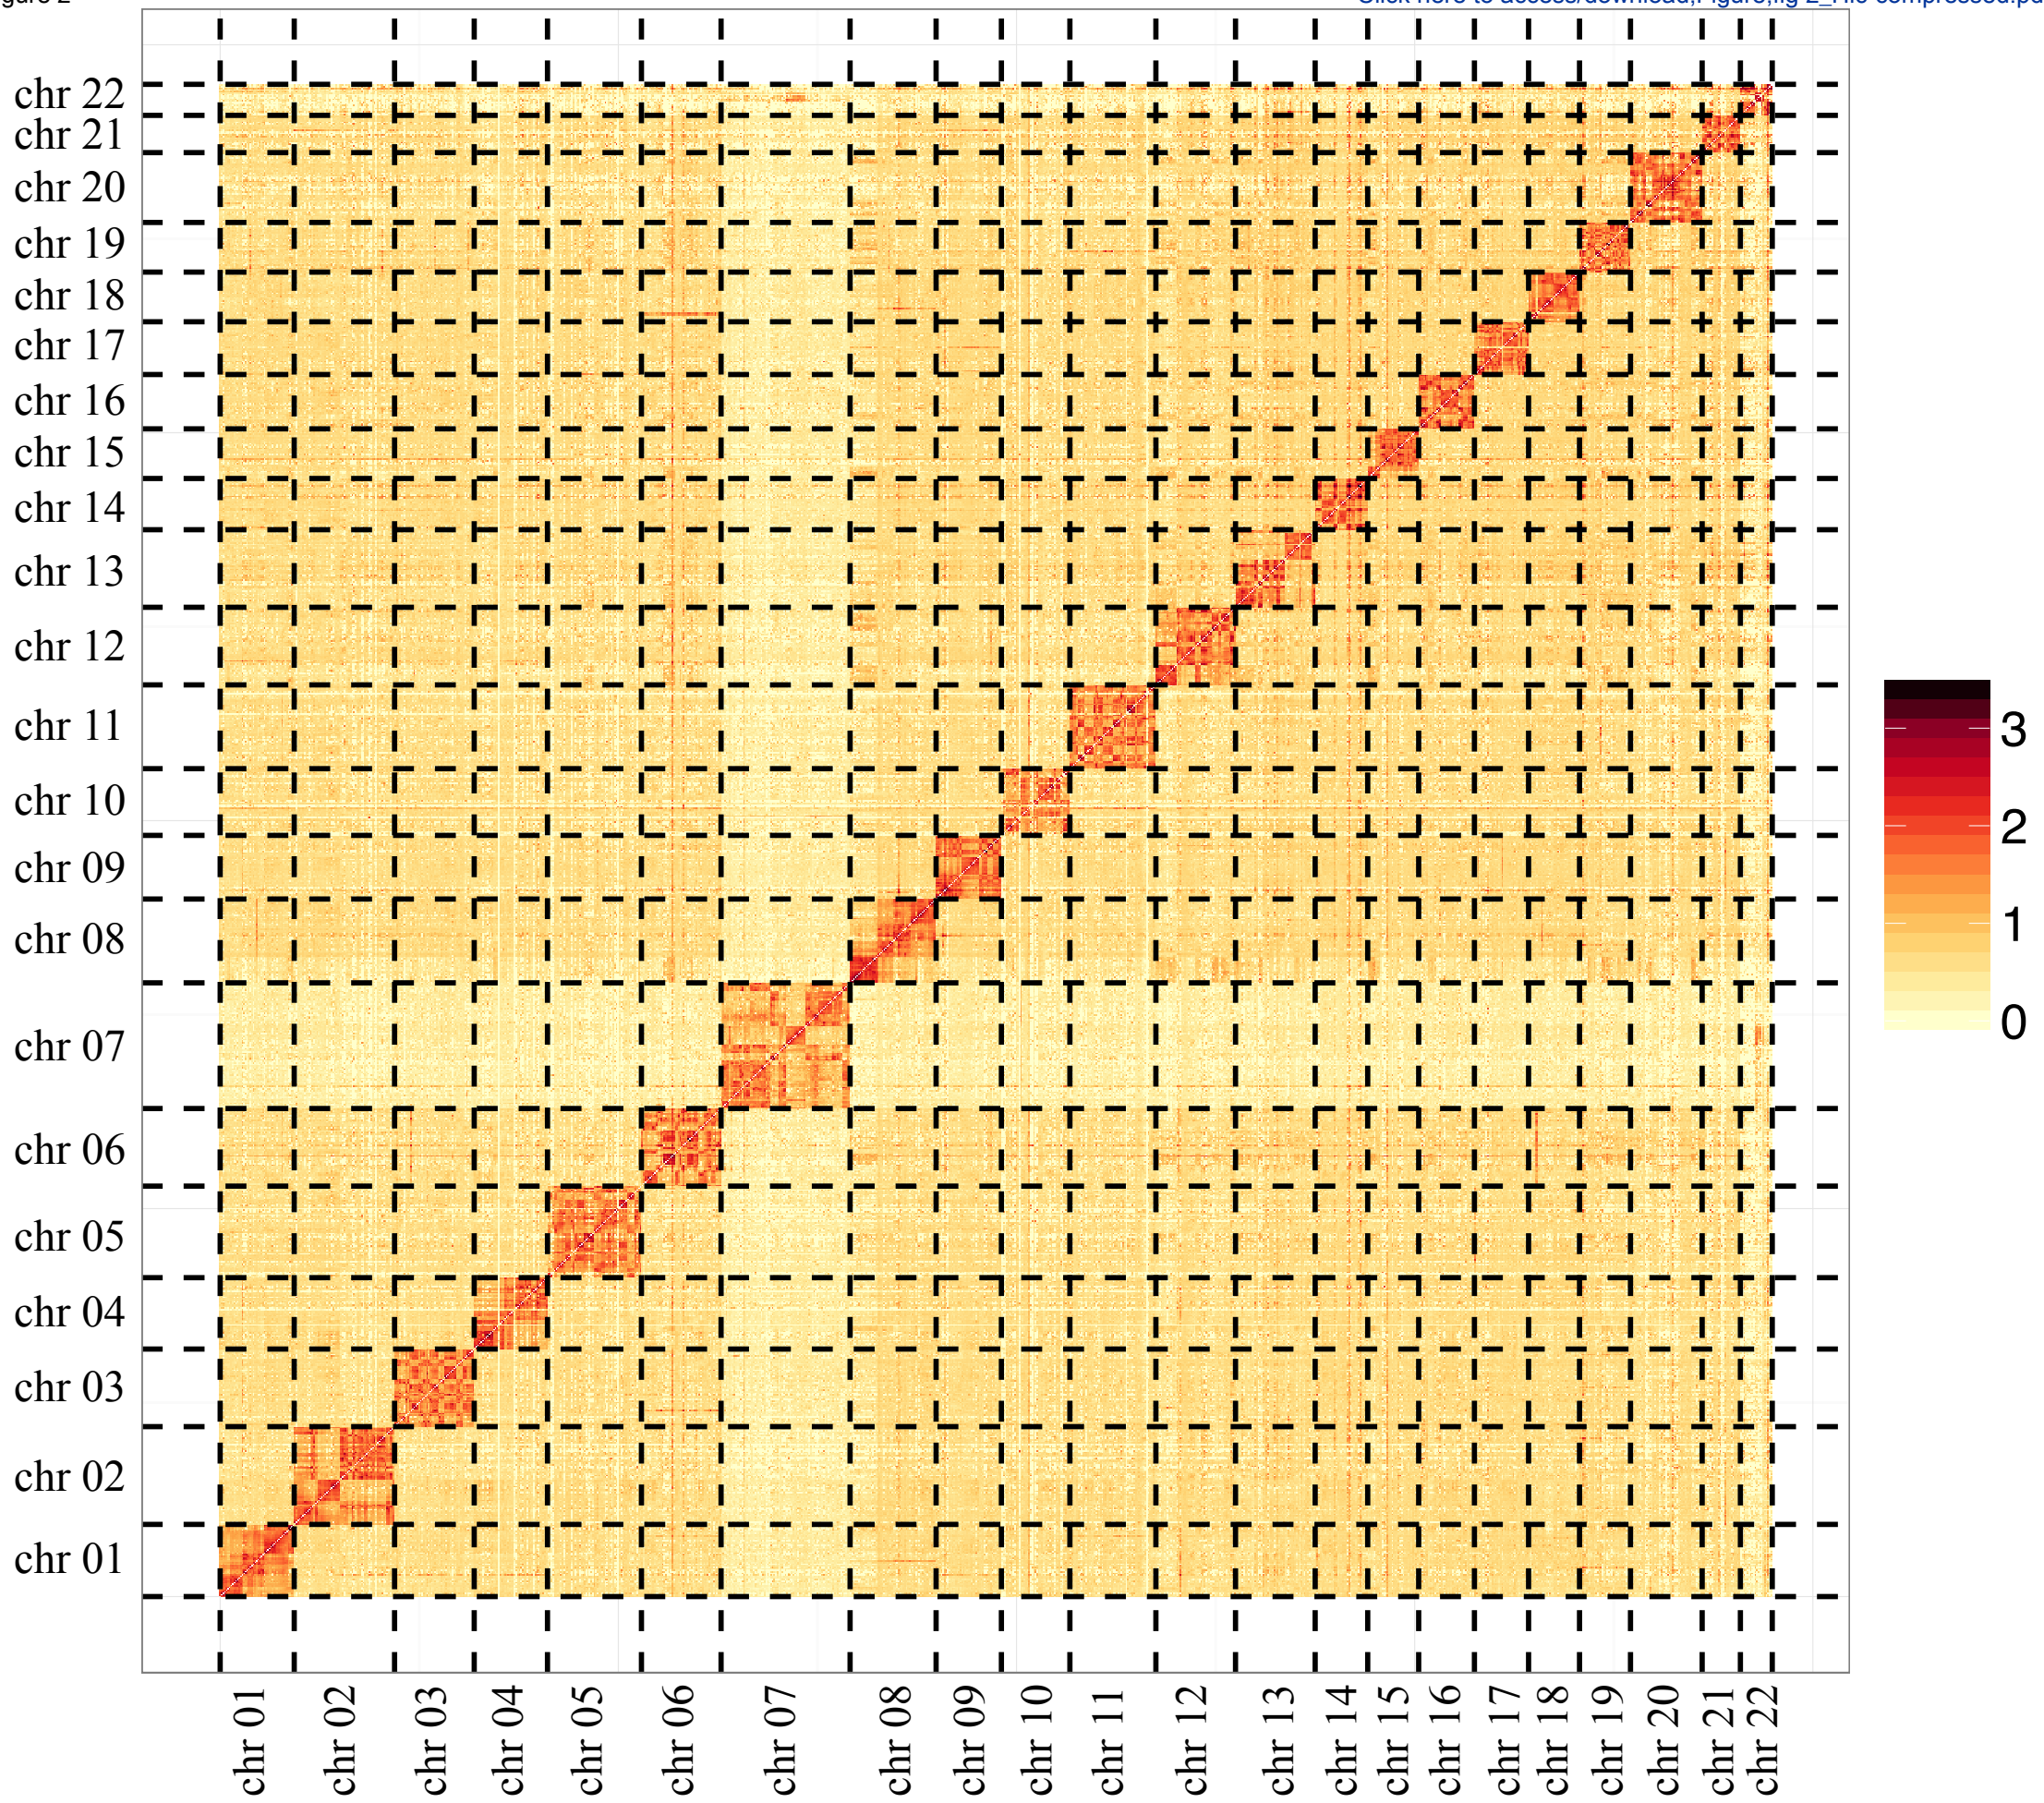



a

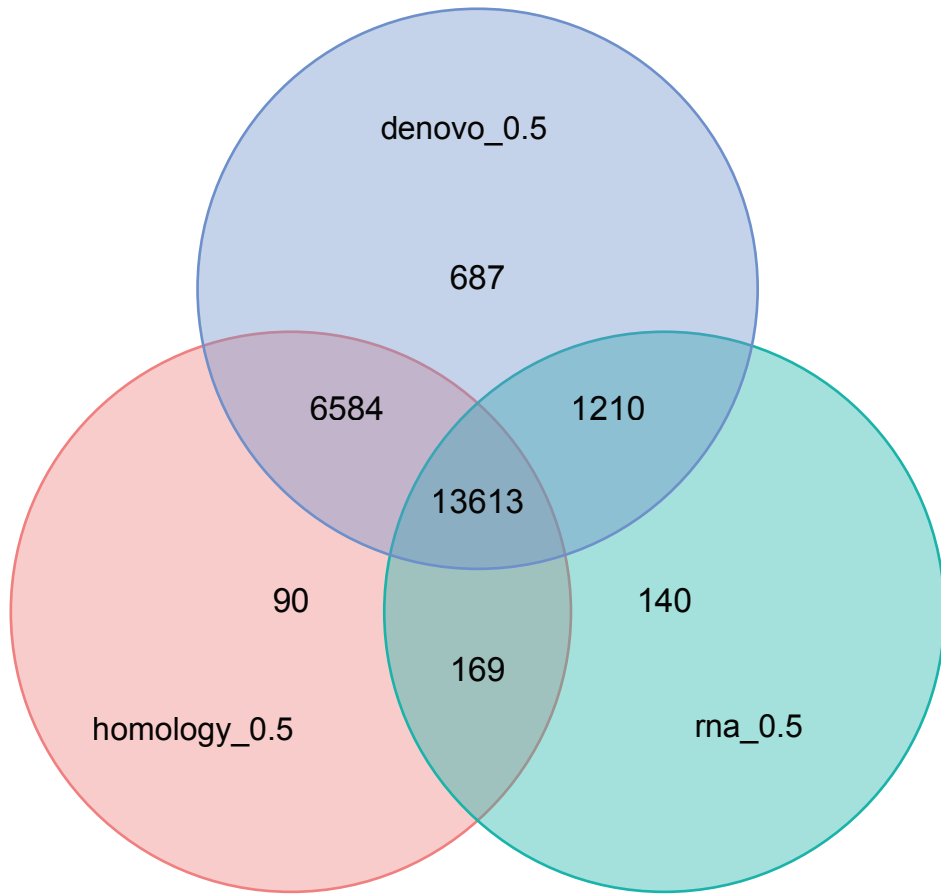

b

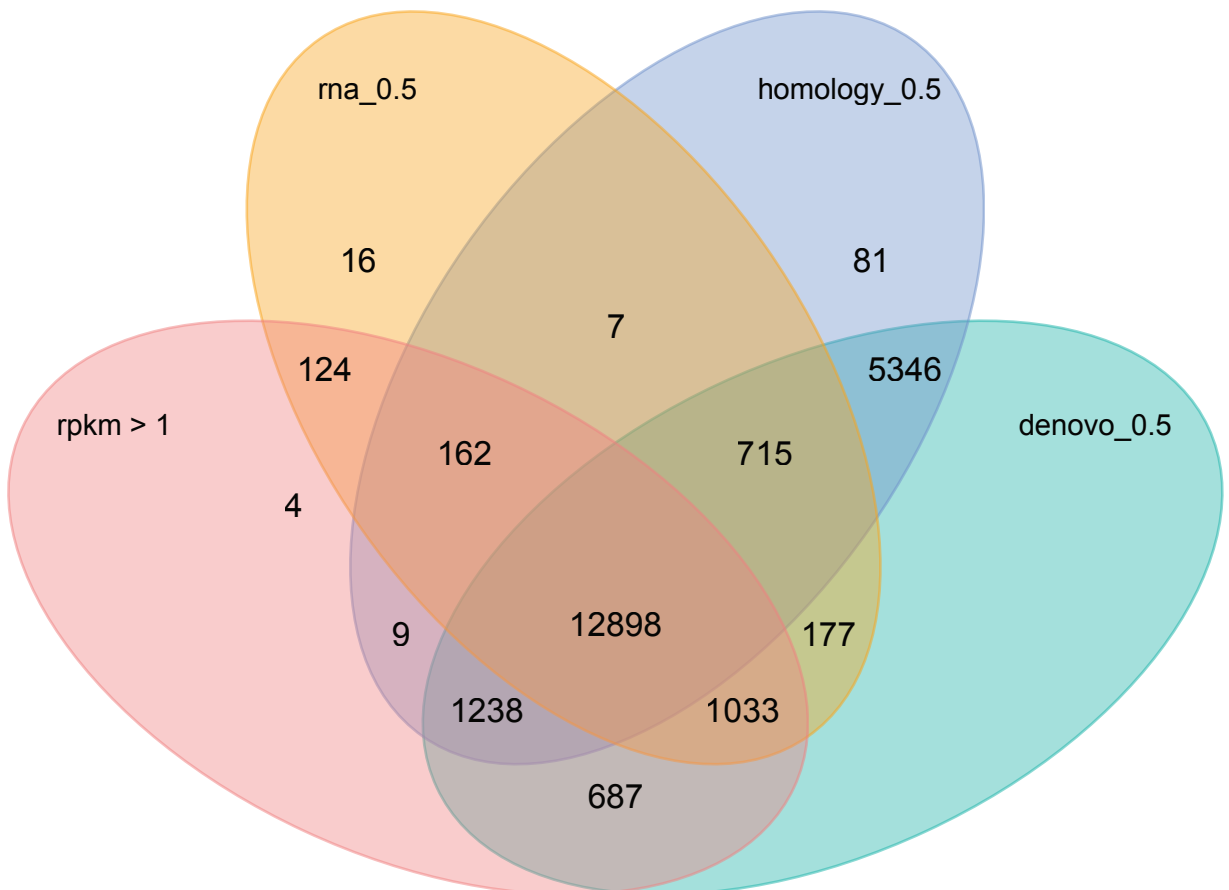

Figure 4

[Click here to access/download;Figure;fig 4-compressed.pdf](#)

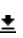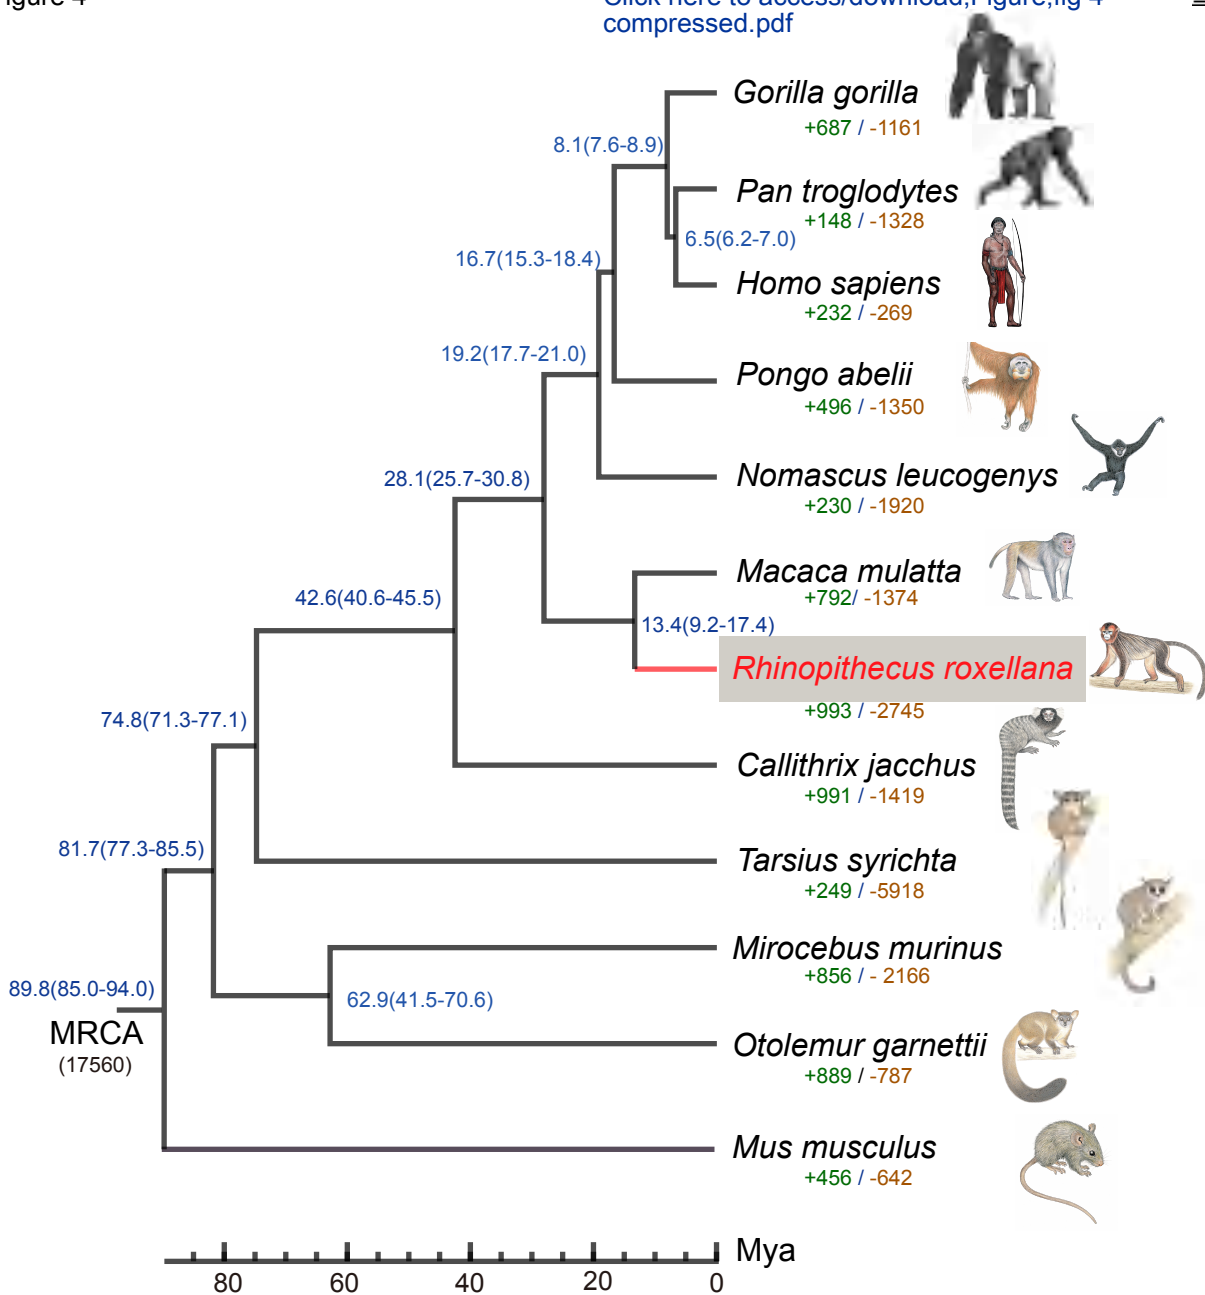



Click here to access/download  
**Supplementary Material**  
SI\_giga\_0609.docx



Dear Hongling,

Thanks for handling our manuscript, and we appreciate the valuable comments from you and two referees.

After digesting these comments, we have carefully revised our manuscript. Firstly, we corrected grammar mistakes and reworded several sentences as suggested by reviewer #1. Secondly, we termed CNVs as duplications and added details about how to identify these duplicate sequences. Thirdly, further analysis of duplicate sequences including location of duplications and examination of genes among these duplications was performed as suggested by reviewer #2.

In this revised version, corrections were made in a document with “Track Changes” mode. Point-by-point responses to the reviewers are also submitted. After addressing the issues raised, we feel the quality of the paper is much improved and hope that our revised manuscript is acceptable for publication in *GigaScience*.

Thanks for your consideration, we look forward to your advice.

Yours sincerely,

Xiao-Guang Qi

Shaanxi Key Laboratory for Animal Conservation

College of Life Sciences

Northwest University

Email: qixg@nwu.edu.cn
